# Supplementary material
Source: PubMed Central journal article supplement (PMC5260846)
Supplement: NIHMS840214-supplement-Supporting_information.pdf [file NIHMS840214-supplement-Supporting_information.pdf]

## Supplemental Information for:

# **Phenolic Metabolites of *Dalea ornata* Affect both Survival and Motility of the Human Pathogenic Hookworm *Ancylostoma ceylanicum***

Kaitlin Deardorff,<sup>†</sup> William Ray,<sup>‡</sup> Eric Winterstein,<sup>‡</sup> MacKenzie Brown,<sup>‡</sup> Jocelyn McCornack,<sup>†</sup> Brianda Cardenas-Garcia,<sup>†</sup> Kiah Jones,<sup>†</sup> Sarah McNutt,<sup>†</sup> Shannon Fulkerson,<sup>†</sup> Daneel Ferreira,<sup>§</sup> Charlotte Gény,<sup>⊥</sup> Xiaoyan Chen,<sup>⊥</sup> Gil Belofsky,<sup>\*,‡</sup> and Blaise Dondji<sup>\*,†</sup>

<sup>†</sup>Laboratory of Cellular Immunology and Parasitology, Department of Biological Sciences, Central Washington University, Ellensburg, Washington 98926, United States

<sup>‡</sup>Department of Chemistry, Central Washington University, Ellensburg, Washington 98926, United States

<sup>§</sup>Department of Biomolecular Sciences, Division of Pharmacognosy, and the Research Institute of Pharmaceutical Sciences, School of Pharmacy, The University of Mississippi, University, Mississippi 38677, United States

<sup>⊥</sup>Department of Drug Discovery and Biomedical Sciences, The Medical University of South Carolina, Charleston, South Carolina 29425, United States

\*Corresponding Authors: Tel: 509-963-2882. Fax: 509-963-1050. Email: [belofskyg@cwu.edu](mailto:belofskyg@cwu.edu). Tel: 509-963-2715 Fax: 509-963-2370. Email: [dondjib@cwu.edu](mailto:dondjib@cwu.edu)

## **Contents**

| <b>page</b> | <b>description</b>                                                                                                                                                            |
|-------------|-------------------------------------------------------------------------------------------------------------------------------------------------------------------------------|
| 3           | <b>Figure S1.</b> Experimental ECD spectrum of 2( <i>S</i> )-8-(3-methylbut-2-en-1-yl)-6,7,4'-trihydroxyflavanone ( <b>1</b> ).                                               |
| 4           | <b>Figure S2.</b> <sup>1</sup> H NMR spectrum of 2( <i>S</i> )-8-(3-methylbut-2-en-1-yl)-6,7,4'-trihydroxyflavanone ( <b>1</b> ) (400 MHz; acetone- <i>d</i> <sub>6</sub> ).  |
| 5           | <b>Figure S3.</b> <sup>13</sup> C NMR spectrum of 2( <i>S</i> )-8-(3-methylbut-2-en-1-yl)-6,7,4'-trihydroxyflavanone ( <b>1</b> ) (100 MHz; acetone- <i>d</i> <sub>6</sub> ). |
| 6           | <b>Figure S4.</b> HSQC spectrum of 2( <i>S</i> )-8-(3-methylbut-2-en-1-yl)-6,7,4'-trihydroxyflavanone ( <b>1</b> ) (400 MHz; acetone- <i>d</i> <sub>6</sub> ).                |
| 7           | <b>Figure S5.</b> HMBC spectrum of 2( <i>S</i> )-8-(3-methylbut-2-en-1-yl)-6,7,4'-trihydroxyflavanone ( <b>1</b> ) (400 MHz; acetone- <i>d</i> <sub>6</sub> ).                |
| 8           | <b>Figure S6.</b> COSY spectrum of 2( <i>S</i> )-8-(3-methylbut-2-en-1-yl)-6,7,4'-trihydroxyflavanone ( <b>1</b> ) (400 MHz; acetone- <i>d</i> <sub>6</sub> ).                |
| 9           | <b>Figure S7.</b> <sup>1</sup> H NMR spectrum of (+)-medicarpin ( <b>2</b> ) (400 MHz; acetone- <i>d</i> <sub>6</sub> ).                                                      |
| 10          | <b>Figure S8.</b> <sup>13</sup> C NMR spectrum of (+)-medicarpin ( <b>2</b> ) (100 MHz; acetone- <i>d</i> <sub>6</sub> ).                                                     |
| 11          | <b>Figure S9.</b> HSQC spectrum of (+)-medicarpin ( <b>2</b> ) (400 MHz; acetone- <i>d</i> <sub>6</sub> ).                                                                    |
| 12          | <b>Figure S10.</b> HMBC spectrum of (+)-medicarpin ( <b>2</b> ) (400 MHz; acetone- <i>d</i> <sub>6</sub> ).                                                                   |
| 13          | <b>Figure S11.</b> COSY spectrum of (+)-medicarpin ( <b>2</b> ) (400 MHz; acetone- <i>d</i> <sub>6</sub> ).                                                                   |
| 14          | <b>Figure S12.</b> <sup>1</sup> H NMR spectrum of (+)-maackiain ( <b>3</b> ) (400 MHz; acetone- <i>d</i> <sub>6</sub> ).                                                      |
| 15          | <b>Figure S13.</b> <sup>13</sup> C NMR spectrum of (+)-maackiain ( <b>3</b> ) (100 MHz; acetone- <i>d</i> <sub>6</sub> ).                                                     |
| 16          | <b>Figure S14.</b> HSQC spectrum of (+)-maackiain ( <b>3</b> ) (400 MHz; acetone- <i>d</i> <sub>6</sub> ).                                                                    |
| 17          | <b>Figure S15.</b> HMBC spectrum of (+)-maackiain ( <b>3</b> ) (400 MHz; acetone- <i>d</i> <sub>6</sub> ).                                                                    |

Contents, cont.

| page | description                                                                                                                                                                                                    |
|------|----------------------------------------------------------------------------------------------------------------------------------------------------------------------------------------------------------------|
| 18   | <b>Figure S16.</b> COSY spectrum of (+)-maackiain ( <b>3</b> ) (400 MHz; acetone- <i>d</i> <sub>6</sub> ).                                                                                                     |
| 19   | <b>Figure S17.</b> <sup>1</sup> H NMR spectrum of (-)-malheuran A ( <b>4</b> ) (400 MHz; acetone- <i>d</i> <sub>6</sub> ).                                                                                     |
| 20   | <b>Figure S18.</b> <sup>13</sup> C NMR spectrum of (-)-malheuran A ( <b>4</b> ) (100 MHz; acetone- <i>d</i> <sub>6</sub> ).                                                                                    |
| 21   | <b>Figure S19.</b> <sup>1</sup> H NMR spectrum of (-)-euchrenone a <sub>7</sub> ( <b>5</b> ) (400 MHz; acetone- <i>d</i> <sub>6</sub> ).                                                                       |
| 22   | <b>Figure S20.</b> <sup>13</sup> C NMR spectrum of (-)-euchrenone a <sub>7</sub> ( <b>5</b> ) (100 MHz; acetone- <i>d</i> <sub>6</sub> ).                                                                      |
| 23   | <b>Figure S21.</b> HSQC spectrum of (-)-euchrenone a <sub>7</sub> ( <b>5</b> ) (400 MHz; acetone- <i>d</i> <sub>6</sub> ).                                                                                     |
| 24   | <b>Figure S22.</b> HMBC spectrum of (-)-euchrenone a <sub>7</sub> ( <b>5</b> ) (400 MHz; acetone- <i>d</i> <sub>6</sub> ).                                                                                     |
| 25   | <b>Figure S23.</b> COSY spectrum of (-)-euchrenone a <sub>7</sub> ( <b>5</b> ) (400 MHz; acetone- <i>d</i> <sub>6</sub> ).                                                                                     |
| 26   | <b>Figure S24.</b> <sup>1</sup> H NMR spectrum of (2 <i>S</i> )-leachianone G ( <b>6</b> ) (400 MHz; acetone- <i>d</i> <sub>6</sub> ).                                                                         |
| 27   | <b>Figure S25.</b> <sup>13</sup> C NMR spectrum of (2 <i>S</i> )-leachianone G ( <b>6</b> ) (100 MHz; acetone- <i>d</i> <sub>6</sub> ).                                                                        |
| 28   | <b>Figure S26.</b> HSQC spectrum of (2 <i>S</i> )-leachianone G ( <b>6</b> ) (400 MHz; acetone- <i>d</i> <sub>6</sub> ).                                                                                       |
| 29   | <b>Figure S27.</b> HMBC spectrum of (2 <i>S</i> )-leachianone G ( <b>6</b> ) (400 MHz; acetone- <i>d</i> <sub>6</sub> ).                                                                                       |
| 30   | <b>Figure S28.</b> COSY spectrum of (2 <i>S</i> )-leachianone G ( <b>6</b> ) (400 MHz; acetone- <i>d</i> <sub>6</sub> ).                                                                                       |
| 31   | <b>Figure S29.</b> <sup>1</sup> H NMR spectrum of (-)-malheuran B ( <b>7</b> ) (400 MHz; acetone- <i>d</i> <sub>6</sub> ).                                                                                     |
| 32   | <b>Figure S30.</b> <sup>13</sup> C NMR spectrum of (-)-malheuran B ( <b>7</b> ) (100 MHz; acetone- <i>d</i> <sub>6</sub> ).                                                                                    |
| 33   | <b>Figure S31.</b> <sup>1</sup> H NMR spectrum of (2 <i>S</i> )-5'-(2-methylbut-3-en-2-yl)-8-(3-methylbut-2-en-1-yl)-5,7,2',4'-tetrahydroxyflavanone ( <b>8</b> ) (400 MHz; acetone- <i>d</i> <sub>6</sub> ).  |
| 34   | <b>Figure S32.</b> <sup>13</sup> C NMR spectrum of (2 <i>S</i> )-5'-(2-methylbut-3-en-2-yl)-8-(3-methylbut-2-en-1-yl)-5,7,2',4'-tetrahydroxyflavanone ( <b>8</b> ) (100 MHz; acetone- <i>d</i> <sub>6</sub> ). |
| 35   | <b>Figure S33.</b> <sup>1</sup> H NMR spectrum of (-)-deguelin ( <b>9</b> ) (400 MHz; acetone- <i>d</i> <sub>6</sub> ).                                                                                        |
| 36   | <b>Figure S34.</b> <sup>13</sup> C NMR spectrum of (-)-deguelin ( <b>9</b> ) (100 MHz; acetone- <i>d</i> <sub>6</sub> ).                                                                                       |
| 37   | <b>Figure S35.</b> HSQC spectrum of (-)-deguelin ( <b>9</b> ) (400 MHz; acetone- <i>d</i> <sub>6</sub> ).                                                                                                      |
| 38   | <b>Figure S36.</b> HMBC spectrum of (-)-deguelin ( <b>9</b> ) (400 MHz; acetone- <i>d</i> <sub>6</sub> ).                                                                                                      |
| 39   | <b>Figure S37.</b> COSY spectrum of (-)-deguelin ( <b>9</b> ) (400 MHz; acetone- <i>d</i> <sub>6</sub> ).                                                                                                      |
| 40   | <b>Figure S38.</b> <sup>1</sup> H NMR spectrum of (-)-tephrosin ( <b>10</b> ) (400 MHz; acetone- <i>d</i> <sub>6</sub> ).                                                                                      |
| 41   | <b>Figure S39.</b> <sup>13</sup> C NMR spectrum of (-)-tephrosin ( <b>10</b> ) (100 MHz; acetone- <i>d</i> <sub>6</sub> ).                                                                                     |

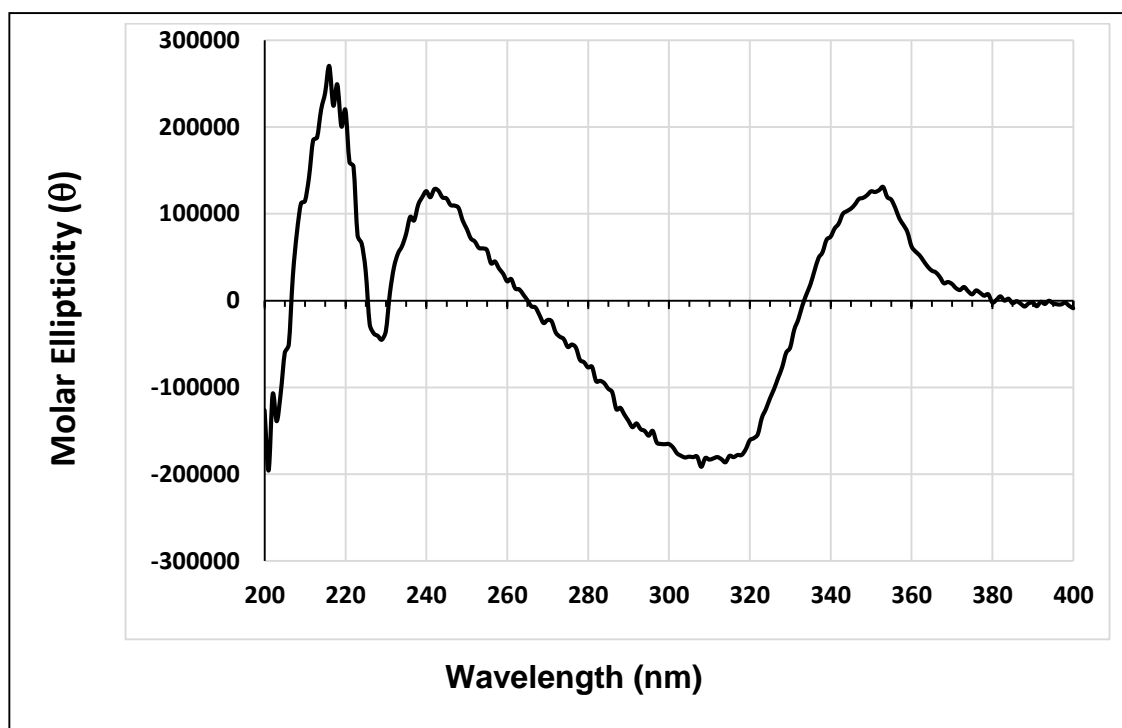

**Figure S1.** Experimental ECD spectrum of 2(*S*)-8-(3-methylbut-2-en-1-yl)-6,7,4'-trihydroxyflavanone (**1**).

"GB-4-78-F2a, acetone-d6" 1 1 /opt/home/belofskyg Dalea ornata

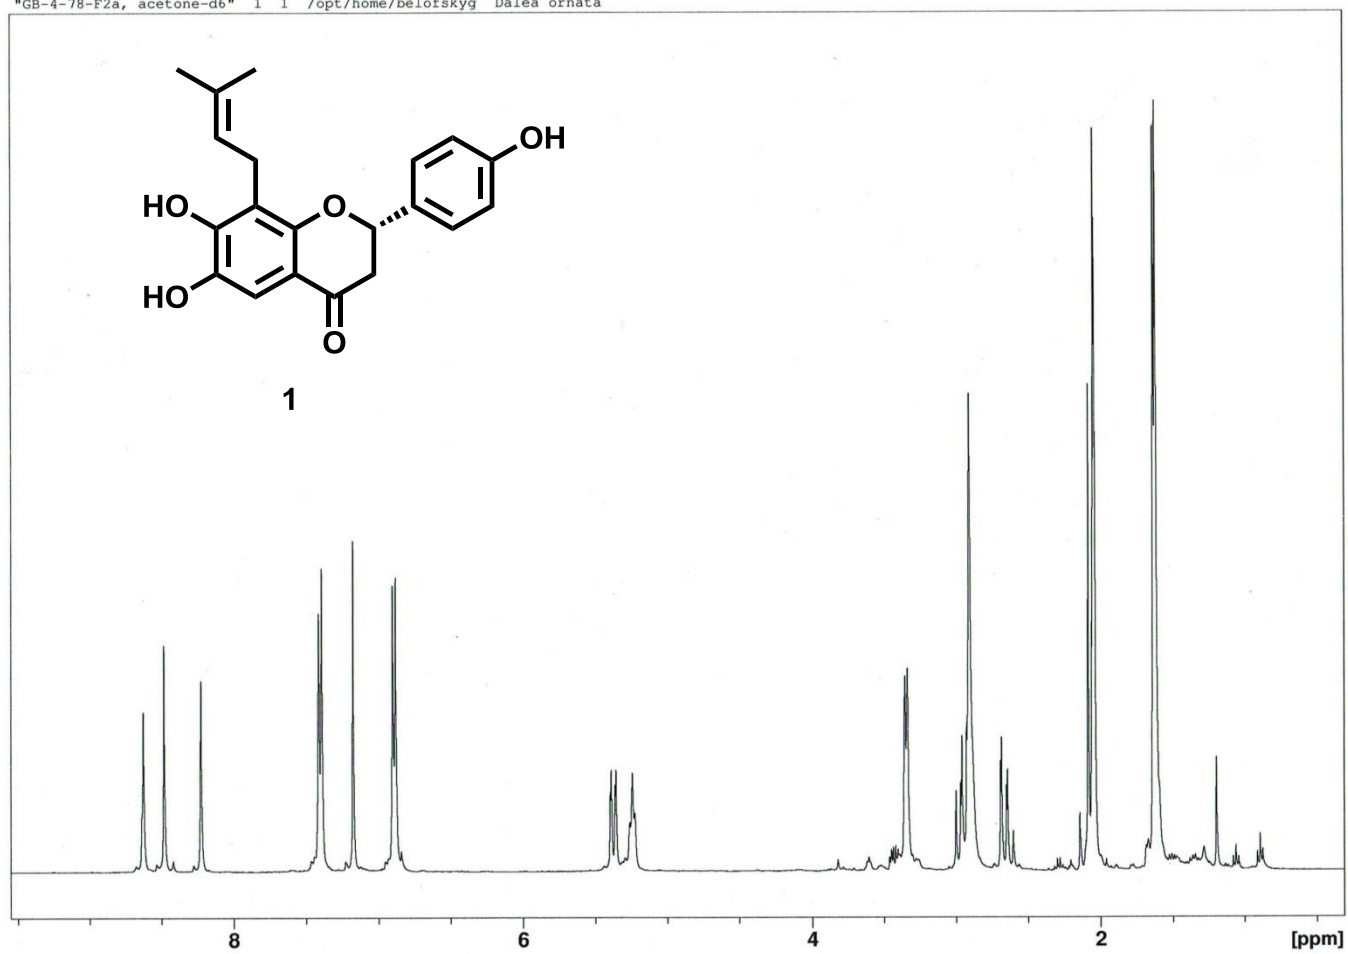

**Figure S2.** <sup>1</sup>H NMR spectrum of 2(*S*)-8-(3-methylbut-2-en-1-yl)-6,7,4'-trihydroxyflavanone (**1**) (400 MHz; acetone-*d*<sub>6</sub>).

"GB-4-78-F2a, acetone-d6" 2 1 /opt/home/belofskyg Dalea ornata

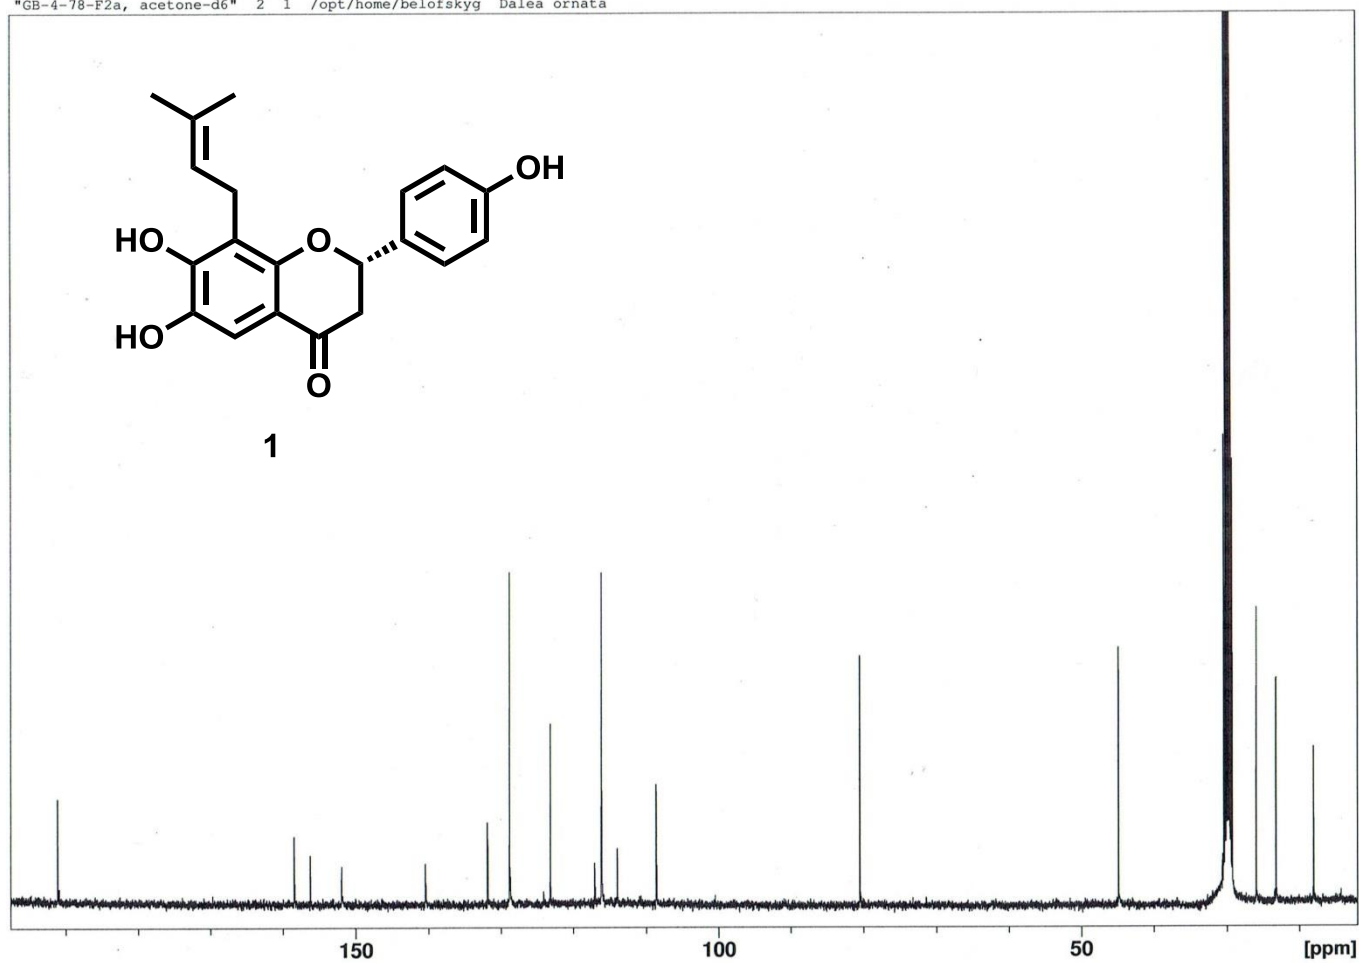

**Figure S3.** <sup>13</sup>C NMR spectrum of 2(S)-8-(3-methylbut-2-en-1-yl)-6,7,4'-trihydroxyflavanone (**1**) (100 MHz; acetone-*d*<sub>6</sub>).

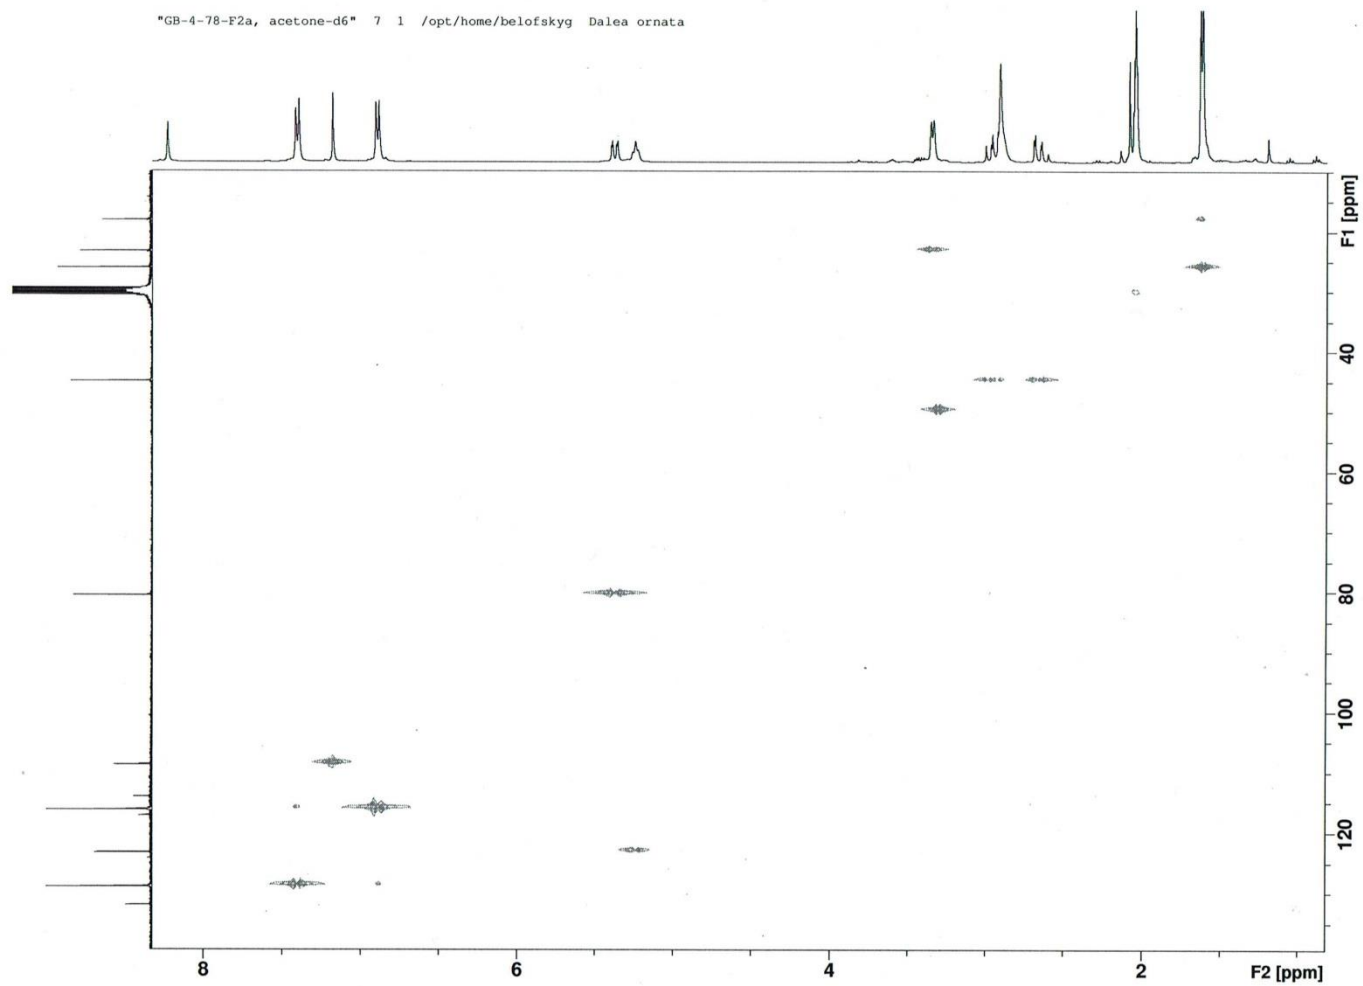

**Figure S4.** HSQC spectrum of 2(*S*)-8-(3-methylbut-2-en-1-yl)-6,7,4'-trihydroxyflavanone (**1**) (400 MHz; acetone-*d*<sub>6</sub>).

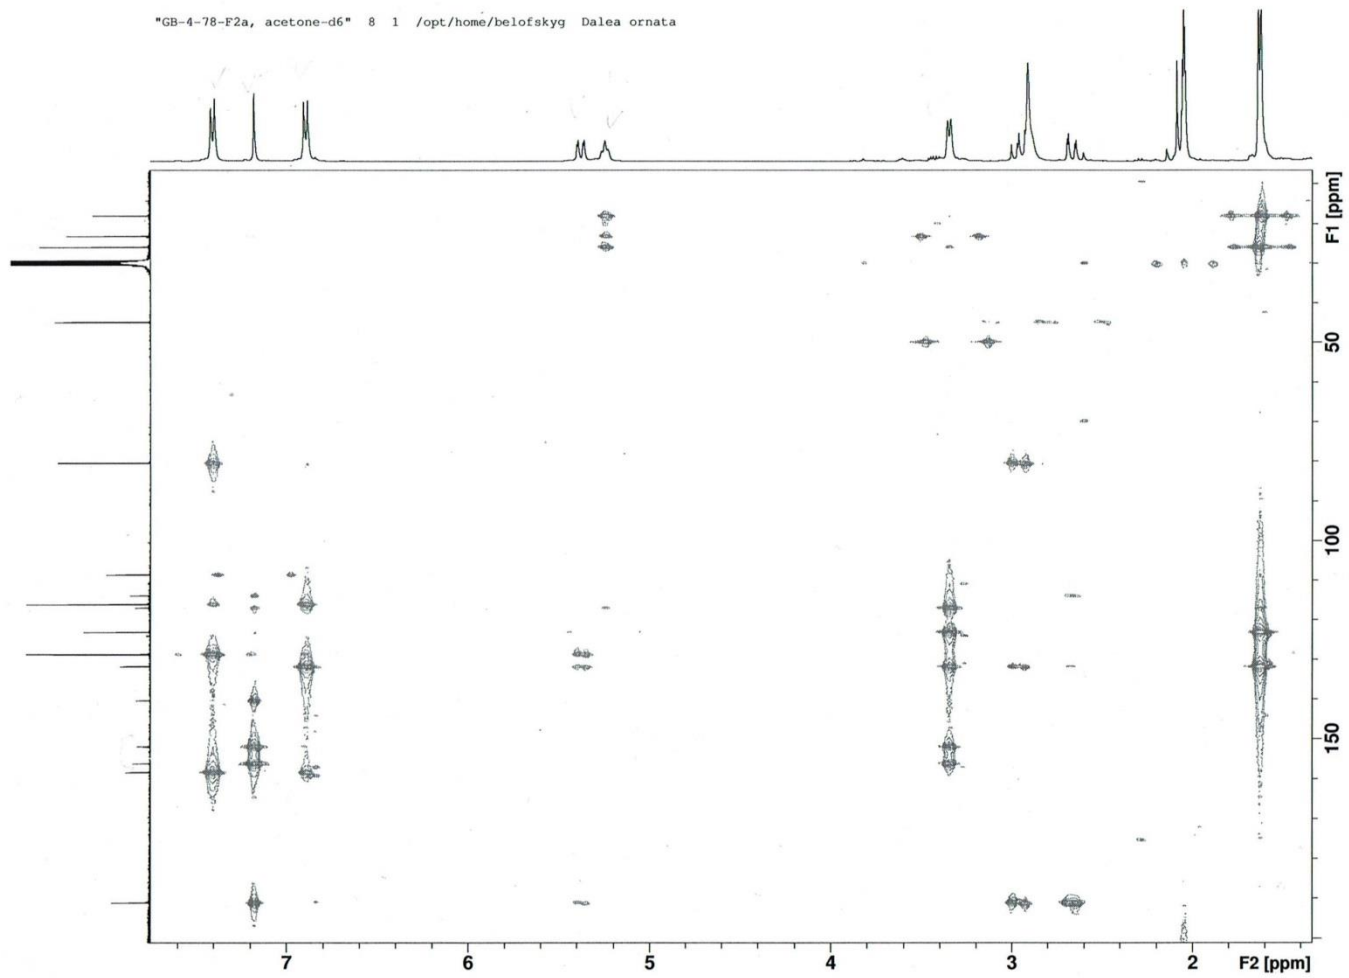

**Figure S5.** HMBC spectrum of 2(*S*)-8-(3-methylbut-2-en-1-yl)-6,7,4'-trihydroxyflavanone (**1**) (400 MHz; acetone-*d*<sub>6</sub>).

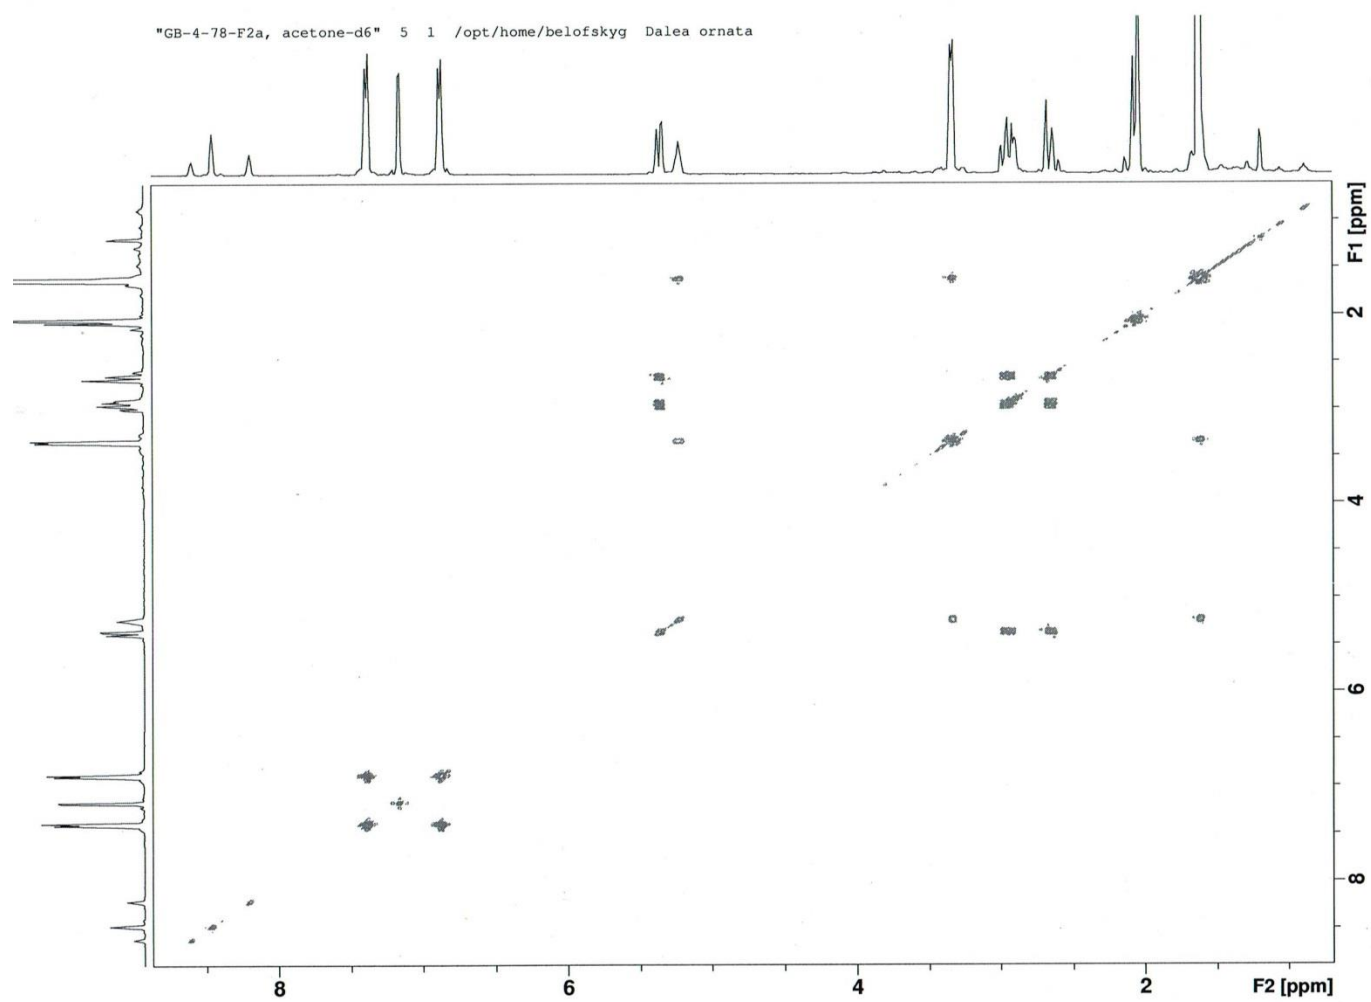

**Figure S6.** COSY spectrum of 2(*S*)-8-(3-methylbut-2-en-1-yl)-6,7,4'-trihydroxyflavanone (**1**) (400 MHz; acetone-*d*<sub>6</sub>).



\*GB-4-29-F2, acetone-d6\* 1 1 /opt/home/belofskyg Dalea ornata

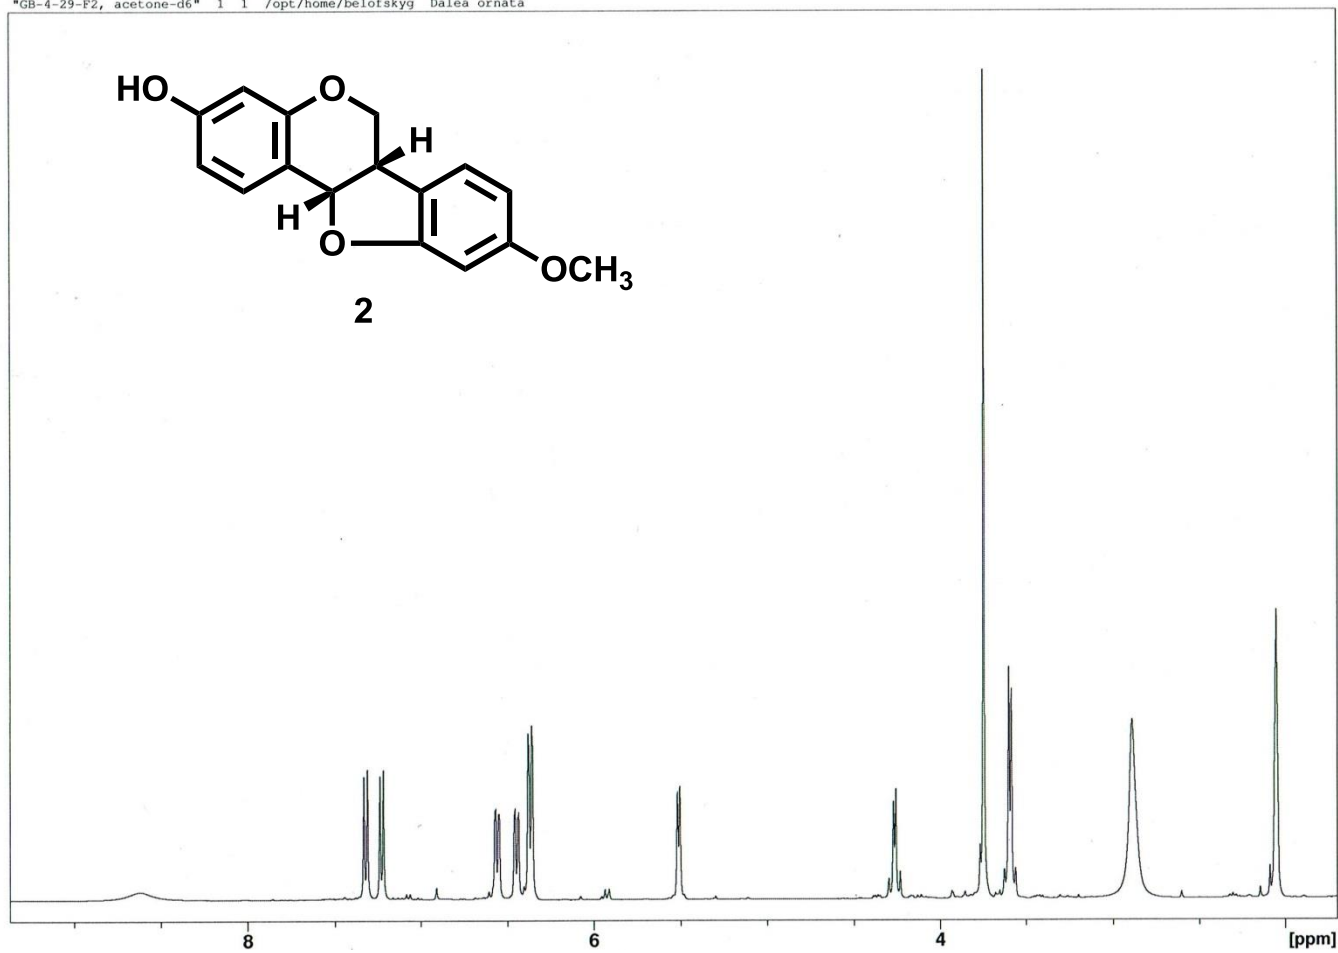

**Figure S7.** <sup>1</sup>H NMR spectrum of (+)-medicarpin (**2**) (400 MHz; acetone-*d*<sub>6</sub>).

"GB-4-29\_F2, 13C, acetone-d6" 1 1 /opt/home/belofskyg Dalea ornata

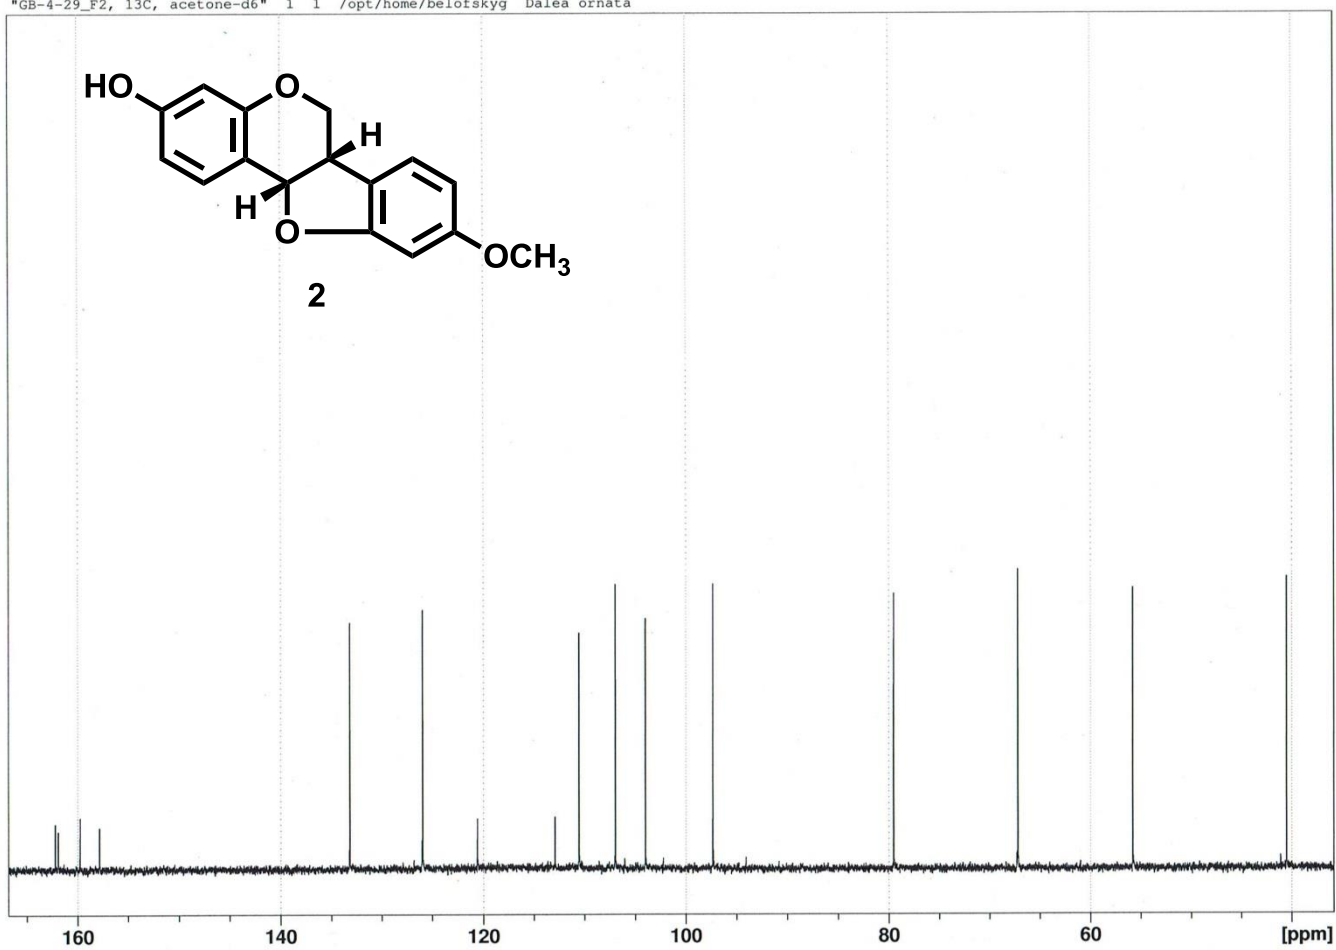

**Figure S8.**  $^{13}\text{C}$  NMR spectrum of (+)-medicarpin (**2**) (100 MHz; acetone- $d_6$ ).

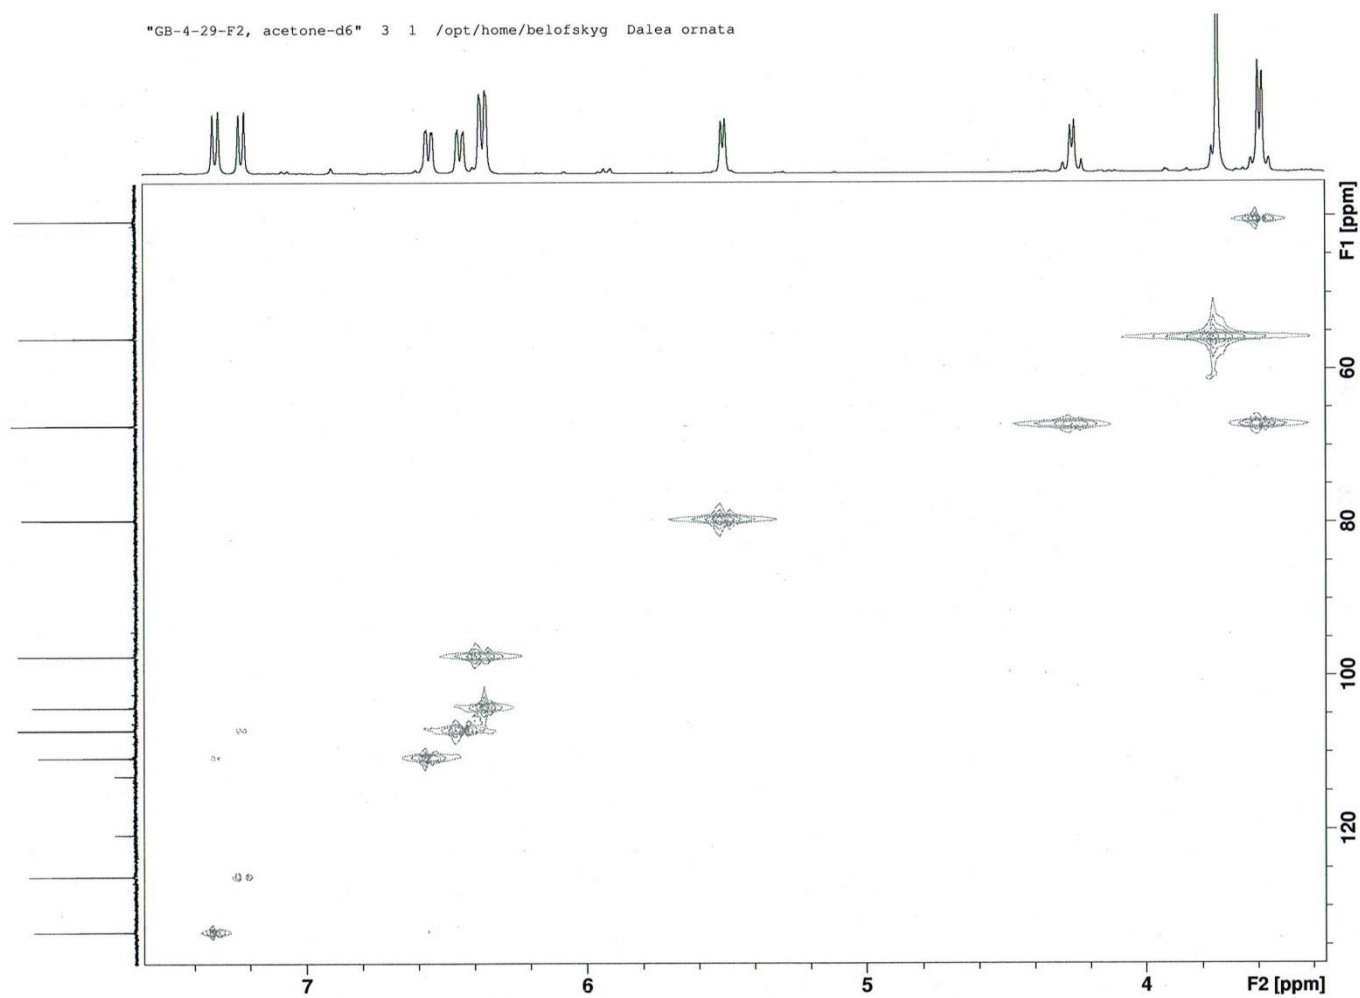

**Figure S9.** HSQC spectrum of (+)-medicarpin (**2**) (400 MHz; acetone- $d_6$ ).

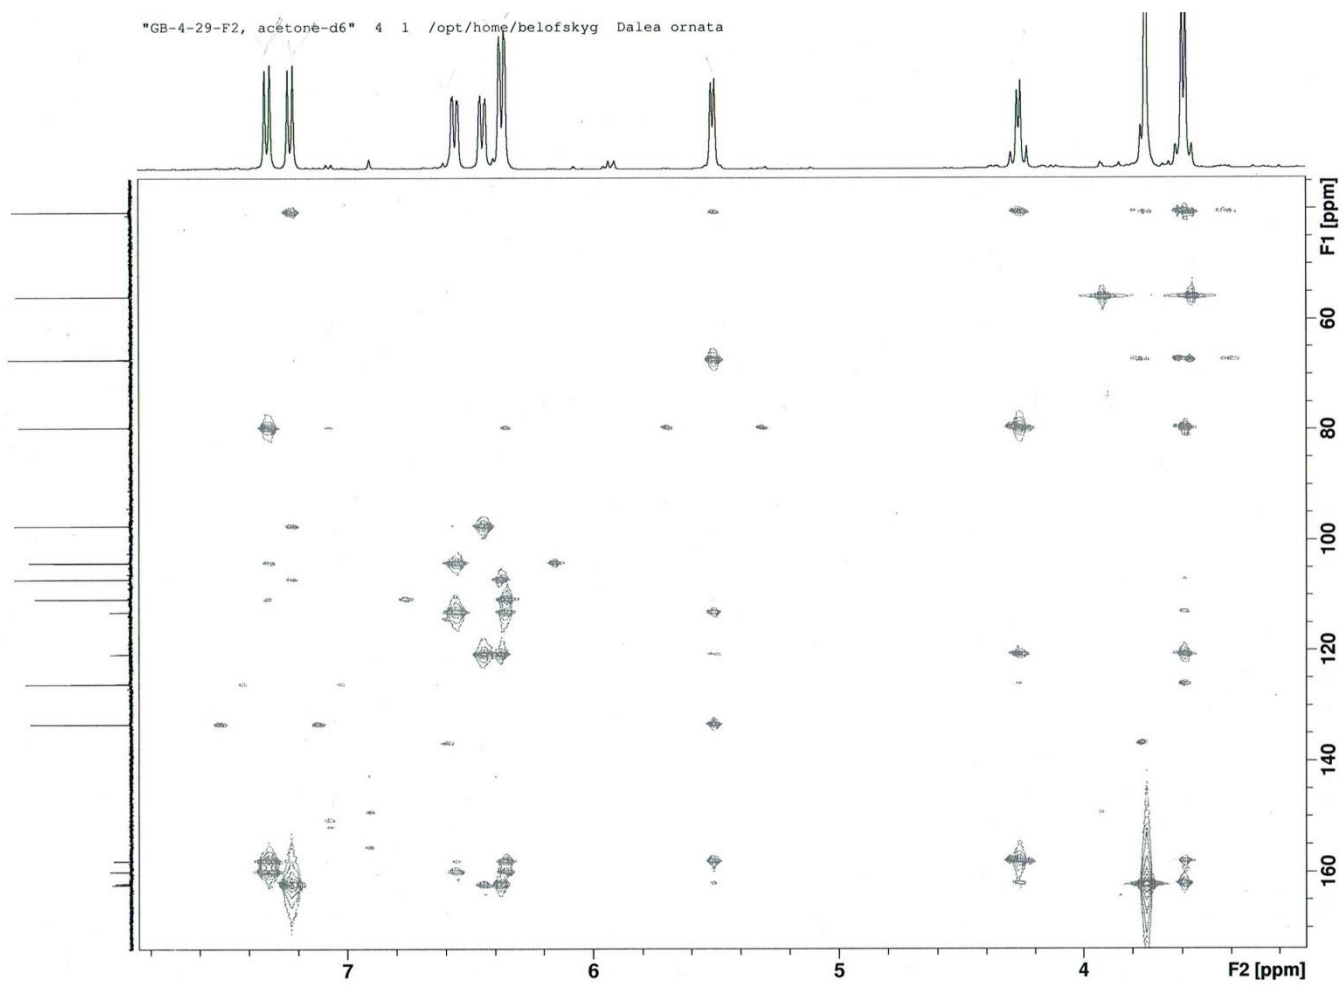

**Figure S10.** HMBC spectrum of (+)-medicarpin (**2**) (400 MHz; acetone- $d_6$ ).

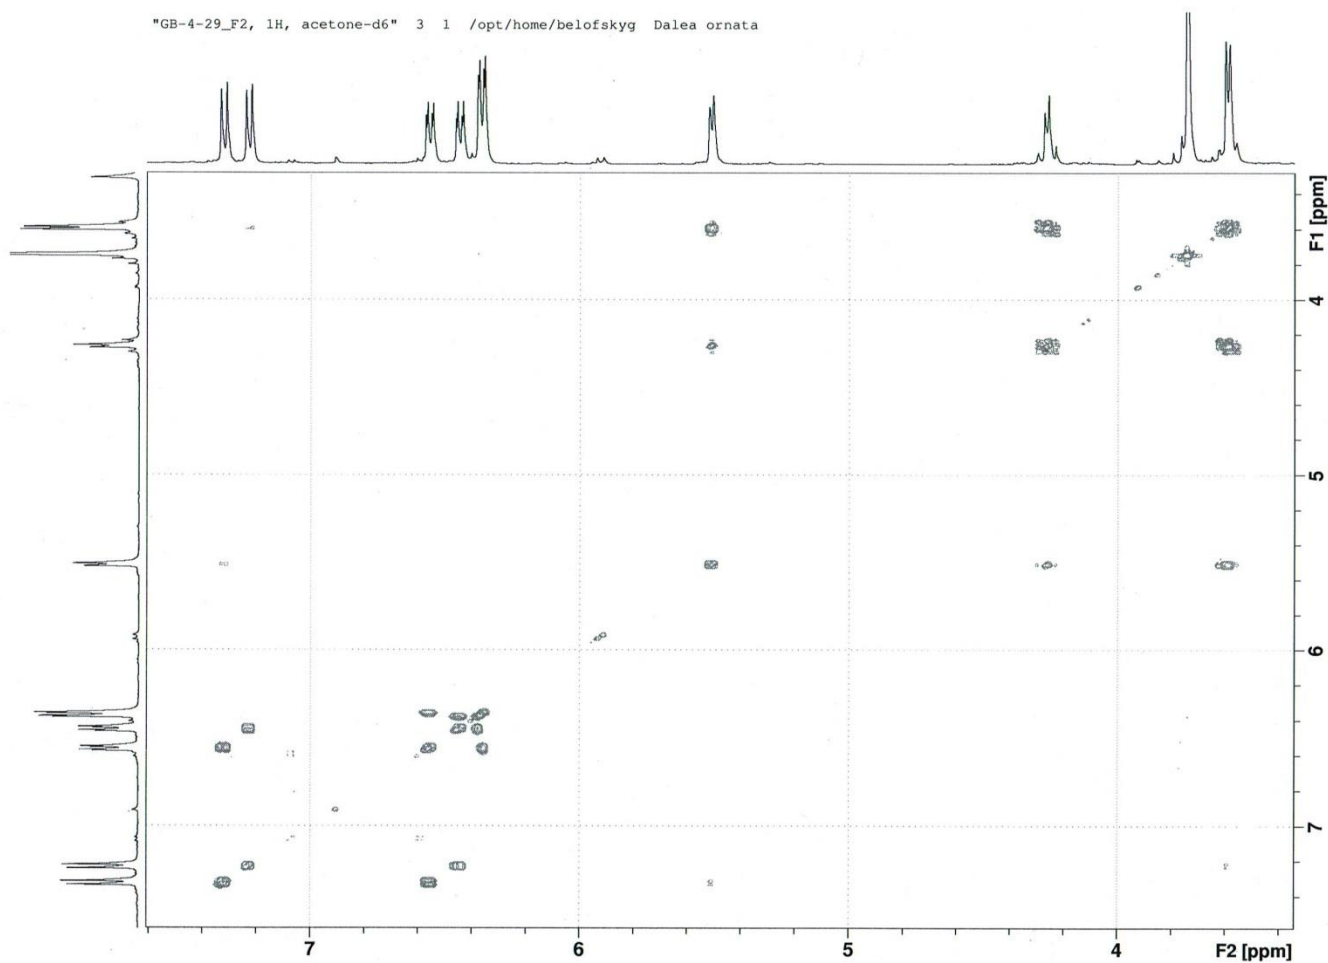

**Figure S11.** COSY spectrum of (+)-medicarpin (**2**) (400 MHz; acetone- $d_6$ ).

"GB-4-21-F2, acetone-d6" 1 1 /opt/home/belofskyg Dalea ornata

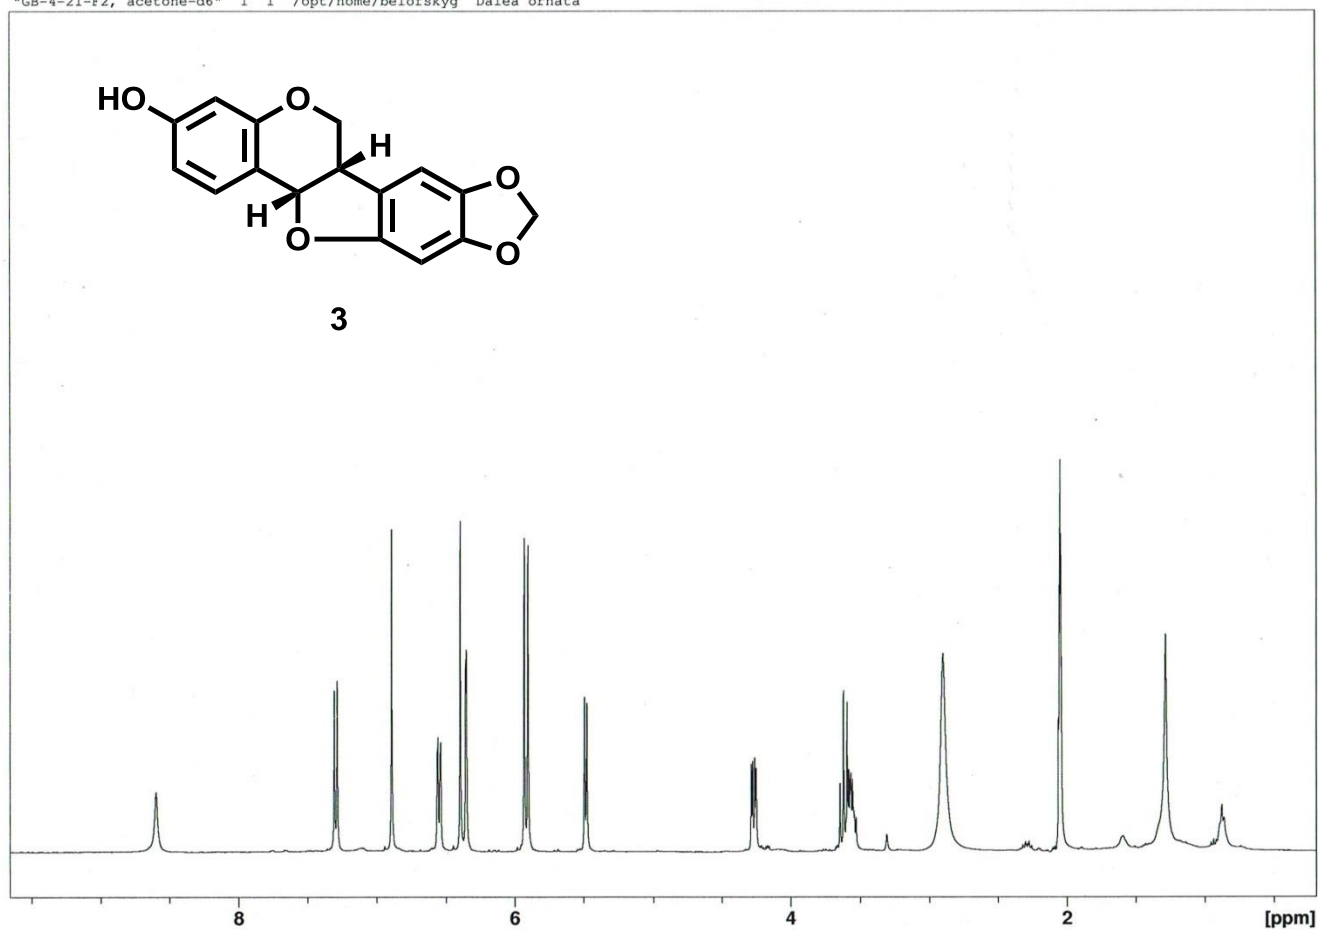

**Figure S12.** <sup>1</sup>H NMR spectrum of (+)-maackiain (**3**) (400 MHz; acetone-*d*<sub>6</sub>).

"GB-4-21-F2, acetone-d6" 2 1 /opt/home/belofskyg Dalea ornata

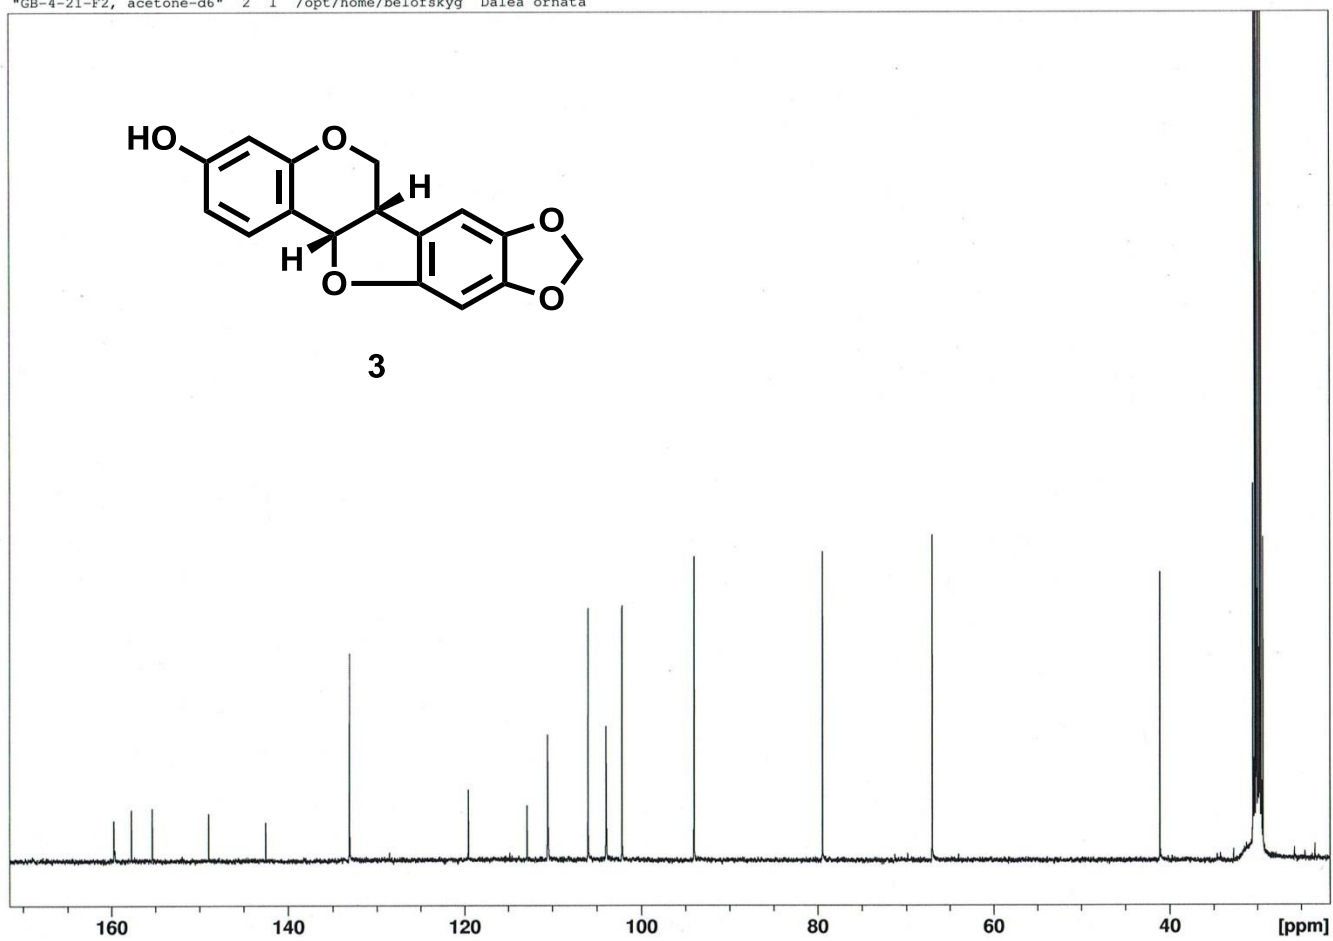

**Figure S13.** <sup>13</sup>C NMR spectrum of (+)-maackiain (**3**) (100 MHz; acetone-*d*<sub>6</sub>).

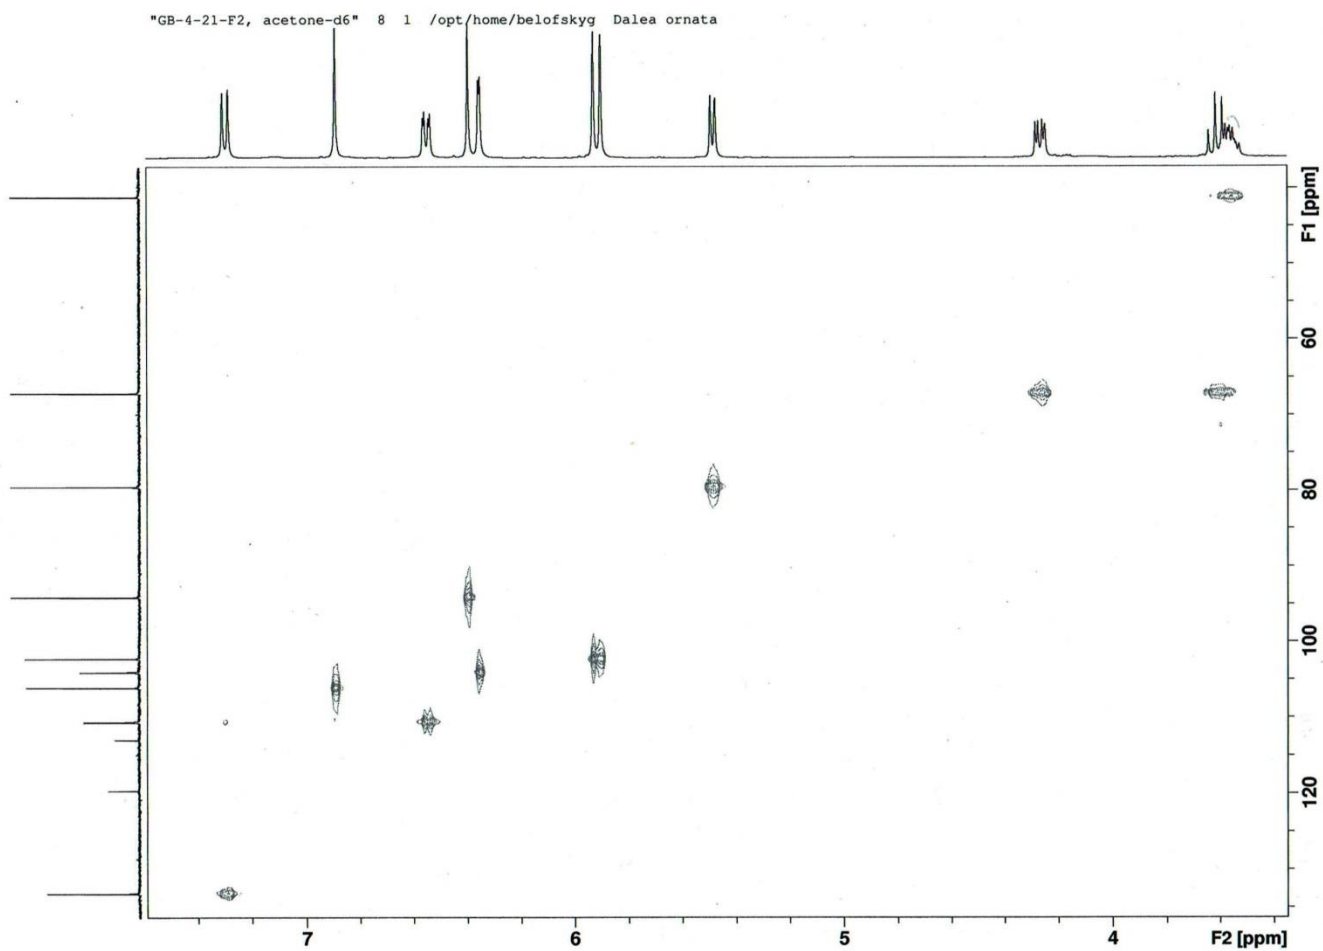

**Figure S14.** HSQC spectrum of (+)-maackiain (**3**) (400 MHz; acetone- $d_6$ ).



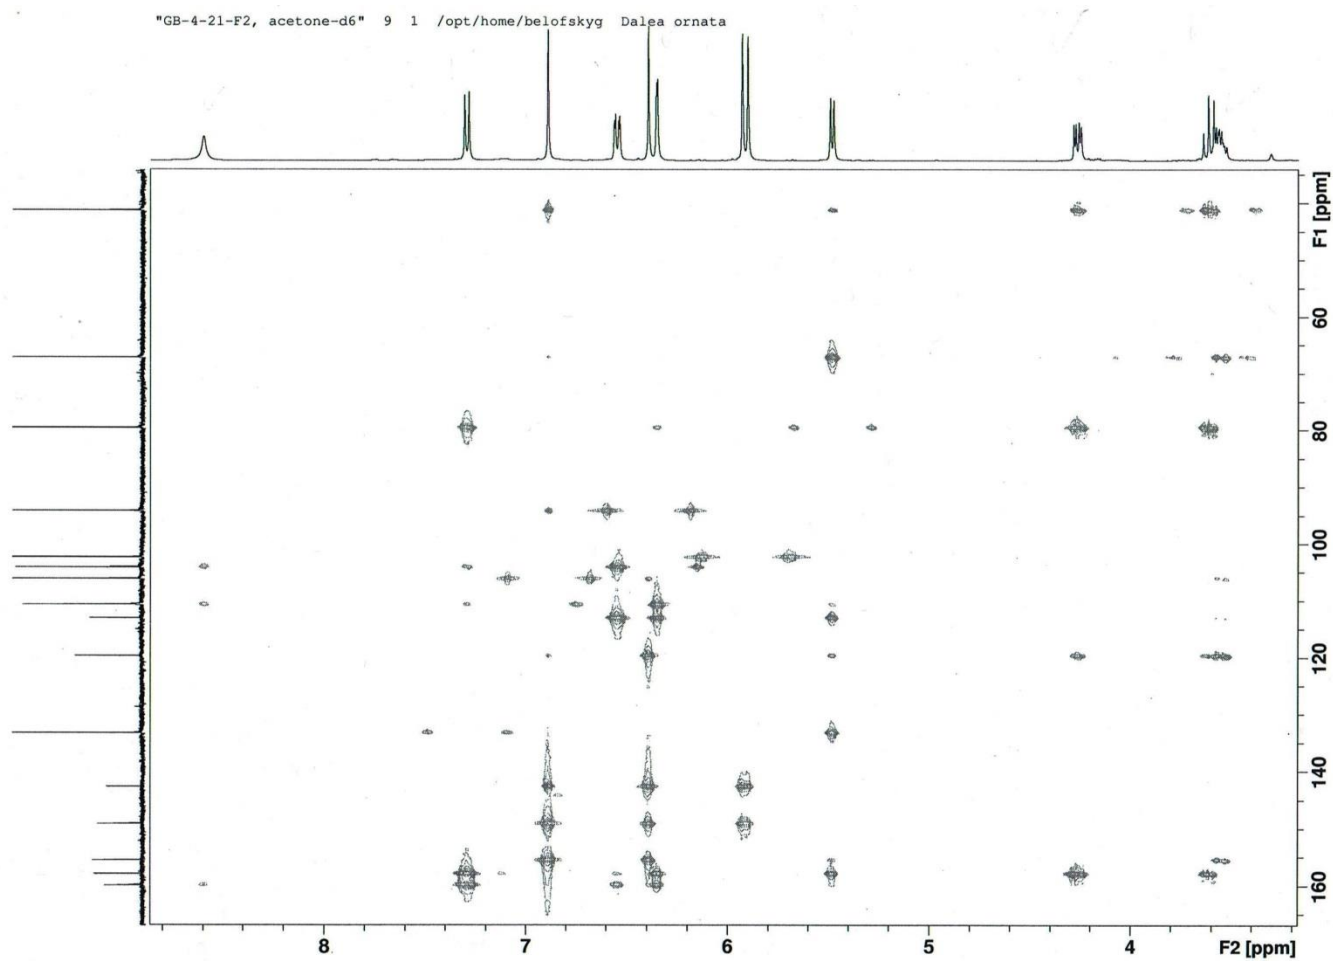

**Figure S15.** HMBC spectrum of (+)-maackiain (**3**) (400 MHz; acetone- $d_6$ ).

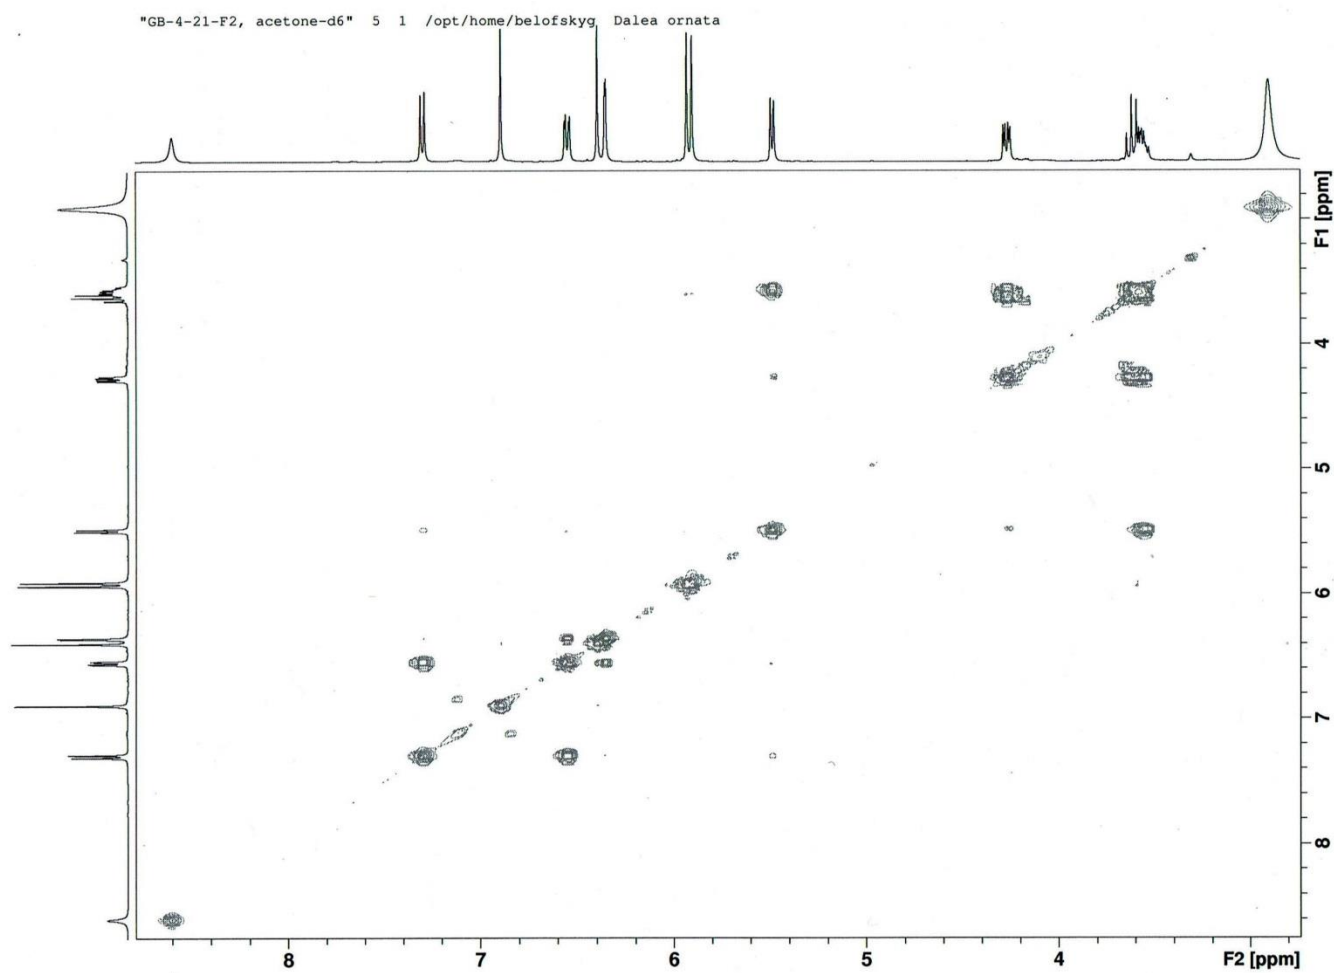

**Figure S16.** COSY spectrum of (+)-maackiain (**3**) (400 MHz; acetone- $d_6$ ).

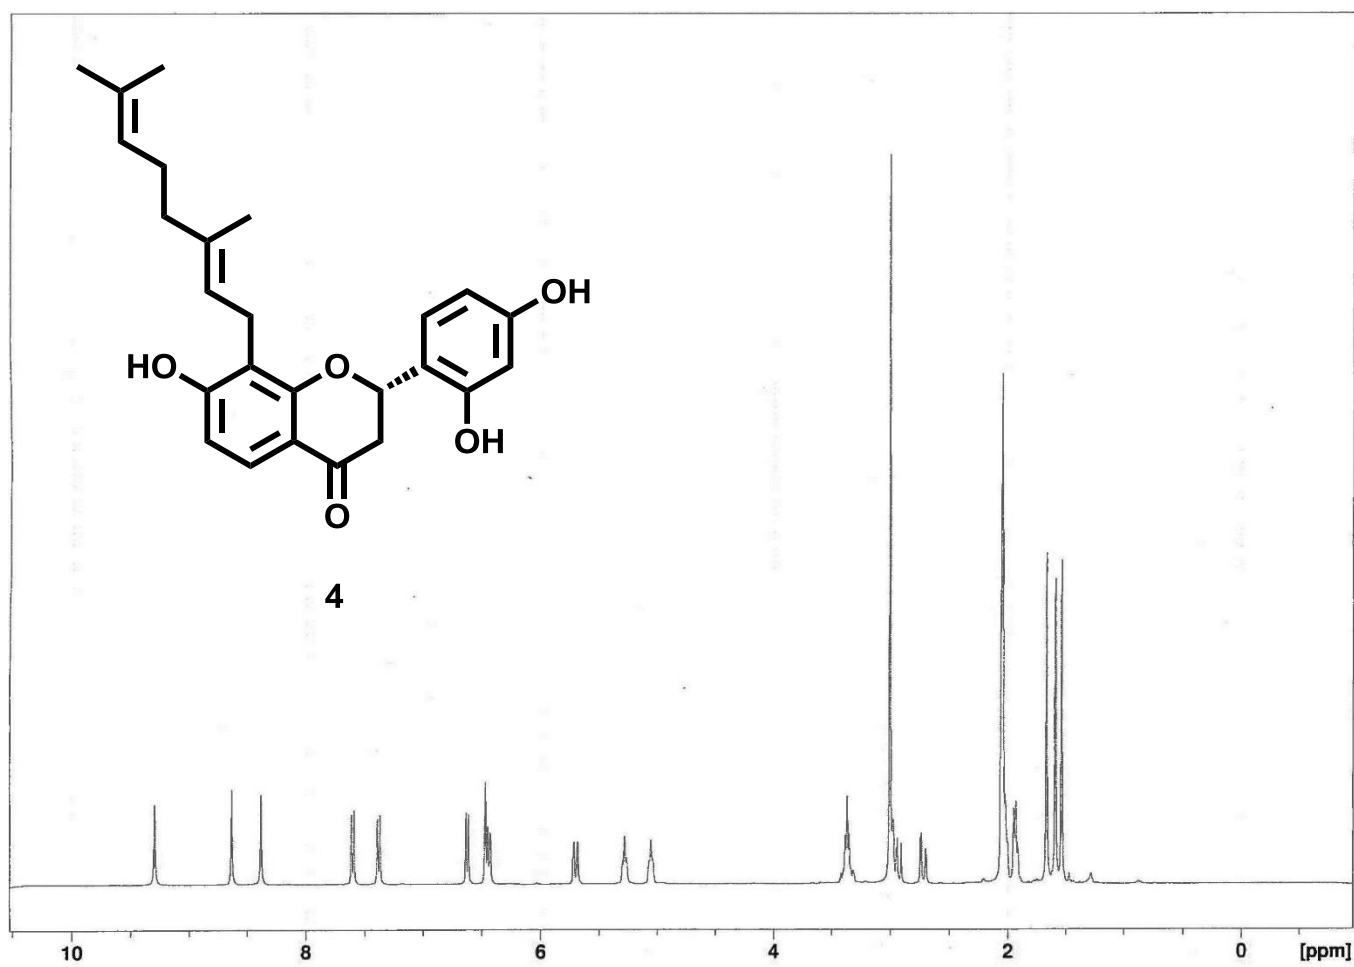

**Figure S17.** <sup>1</sup>H NMR spectrum of (-)-malheuran A (**4**) (400 MHz; acetone-*d*<sub>6</sub>).

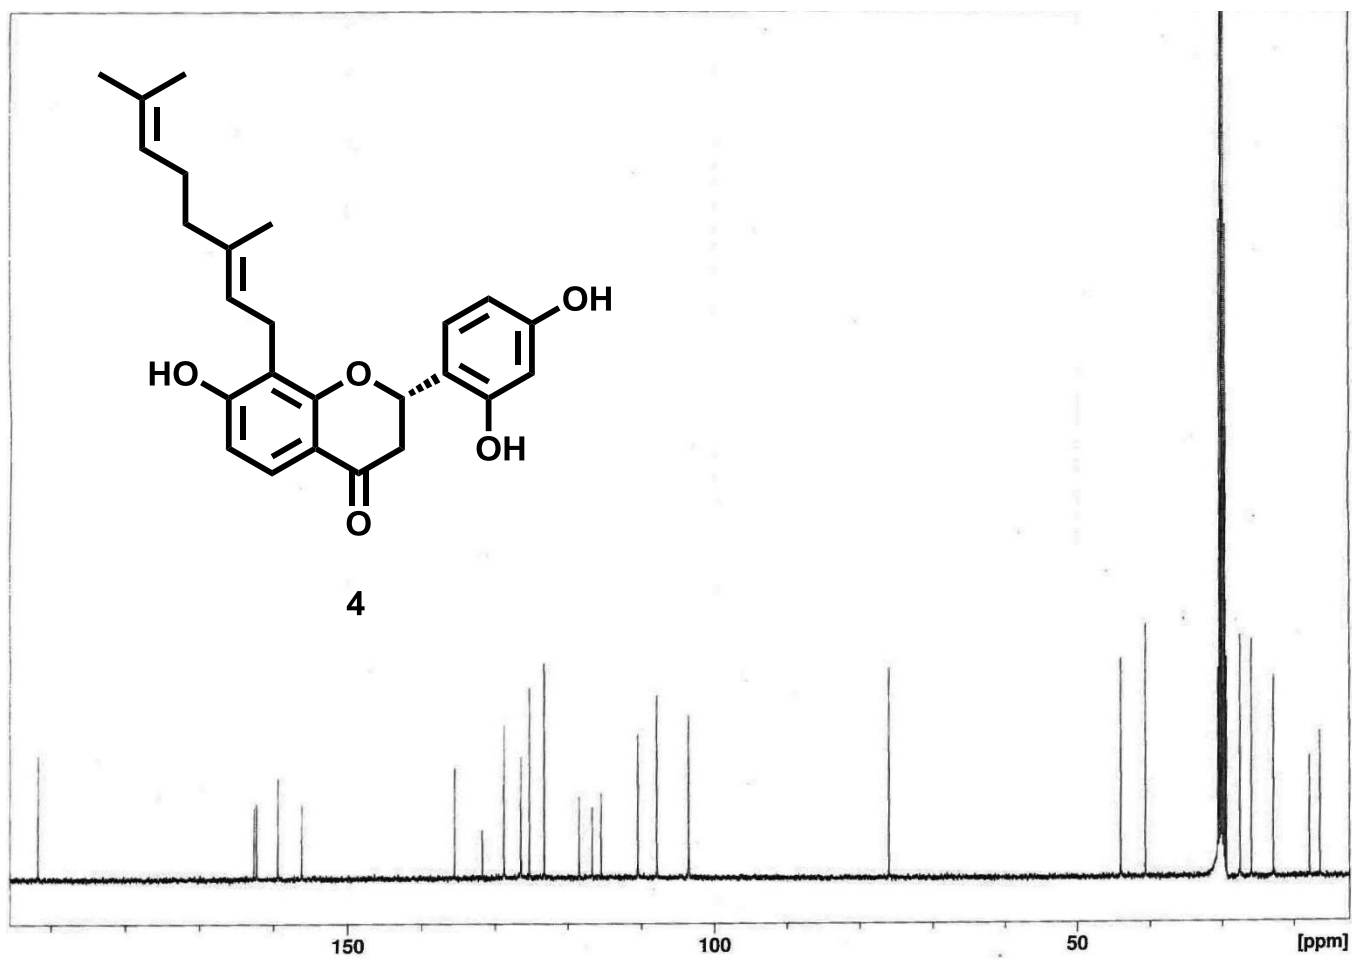

**Figure S18.** <sup>13</sup>C NMR spectrum of (-)-malheuran A (**4**) (100 MHz; acetone-*d*<sub>6</sub>).

"GB-4-47-F8, acetone-d6" 1 1 /opt/home/belofskyg Dalea ornata

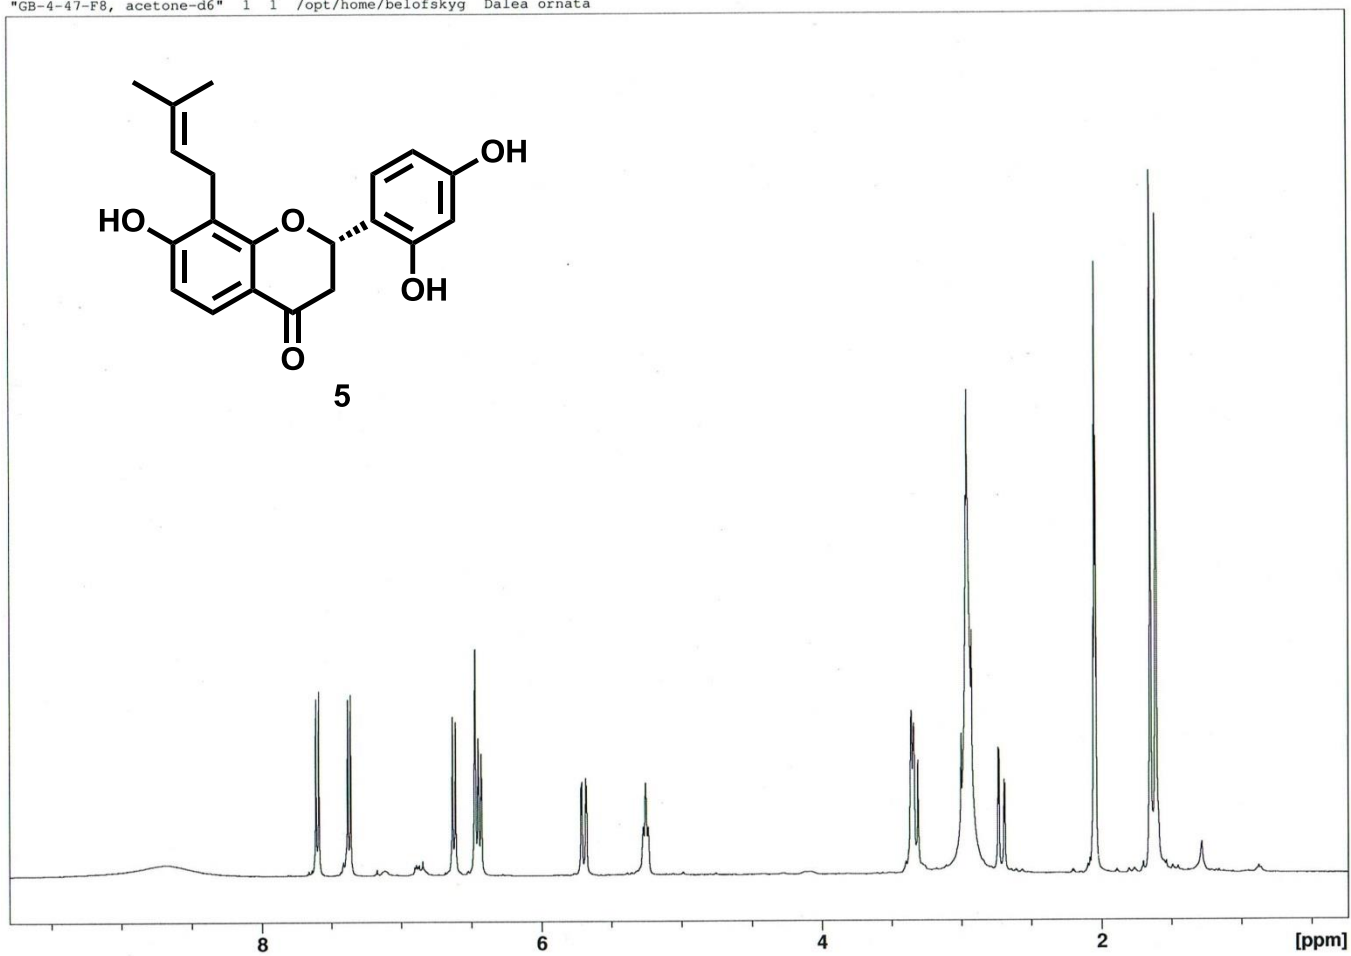

**Figure S19.** <sup>1</sup>H NMR spectrum of (-)-euchrenone a<sub>7</sub> (**5**) (400 MHz; acetone-*d*<sub>6</sub>).

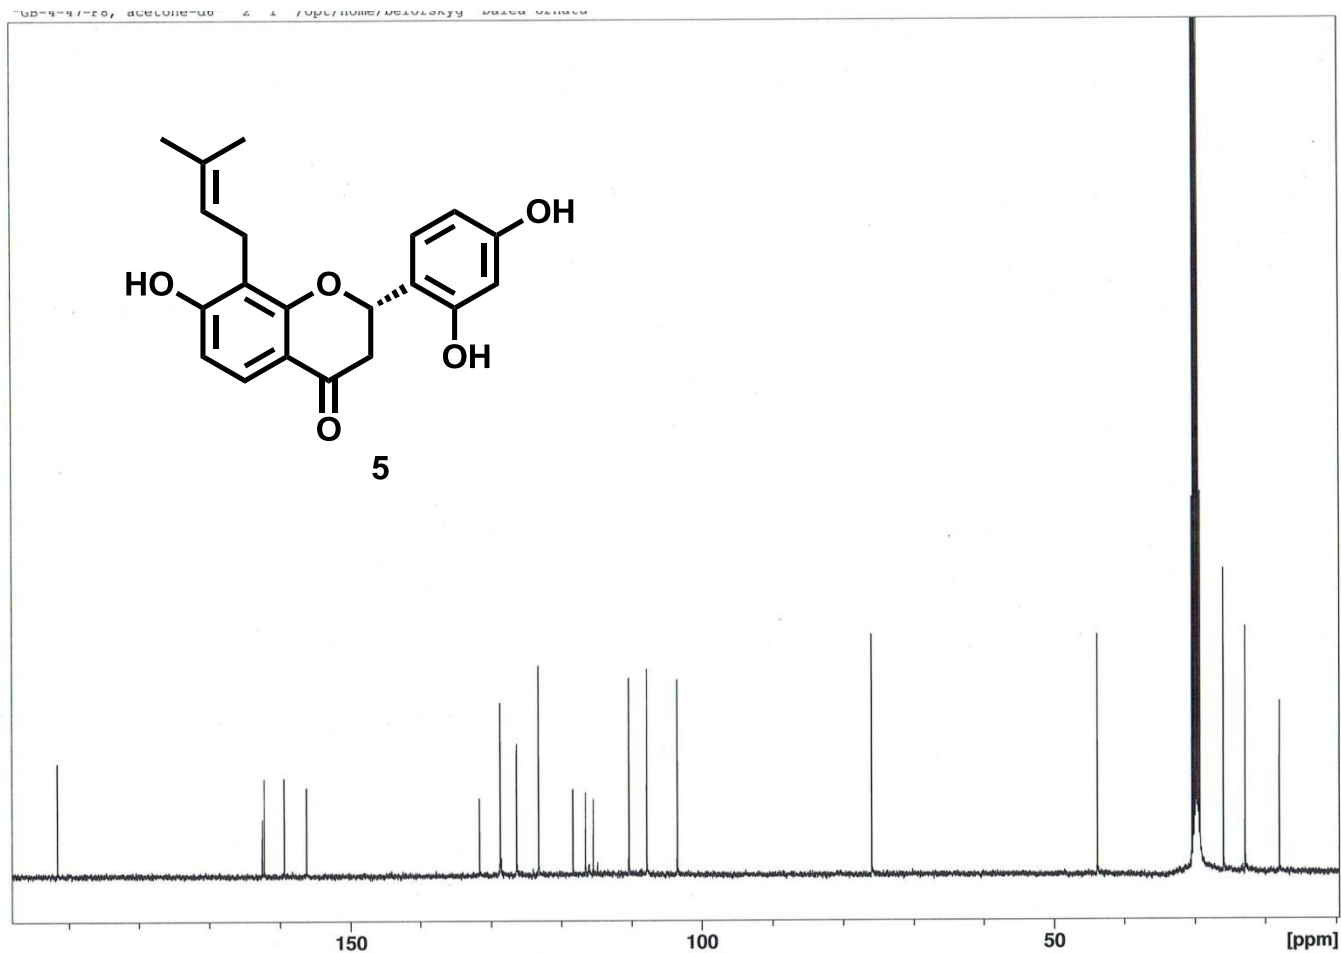

**Figure S20.**  $^{13}\text{C}$  NMR spectrum of (-)-euchrenone  $a_7$  (**5**) (100 MHz; acetone- $d_6$ ).

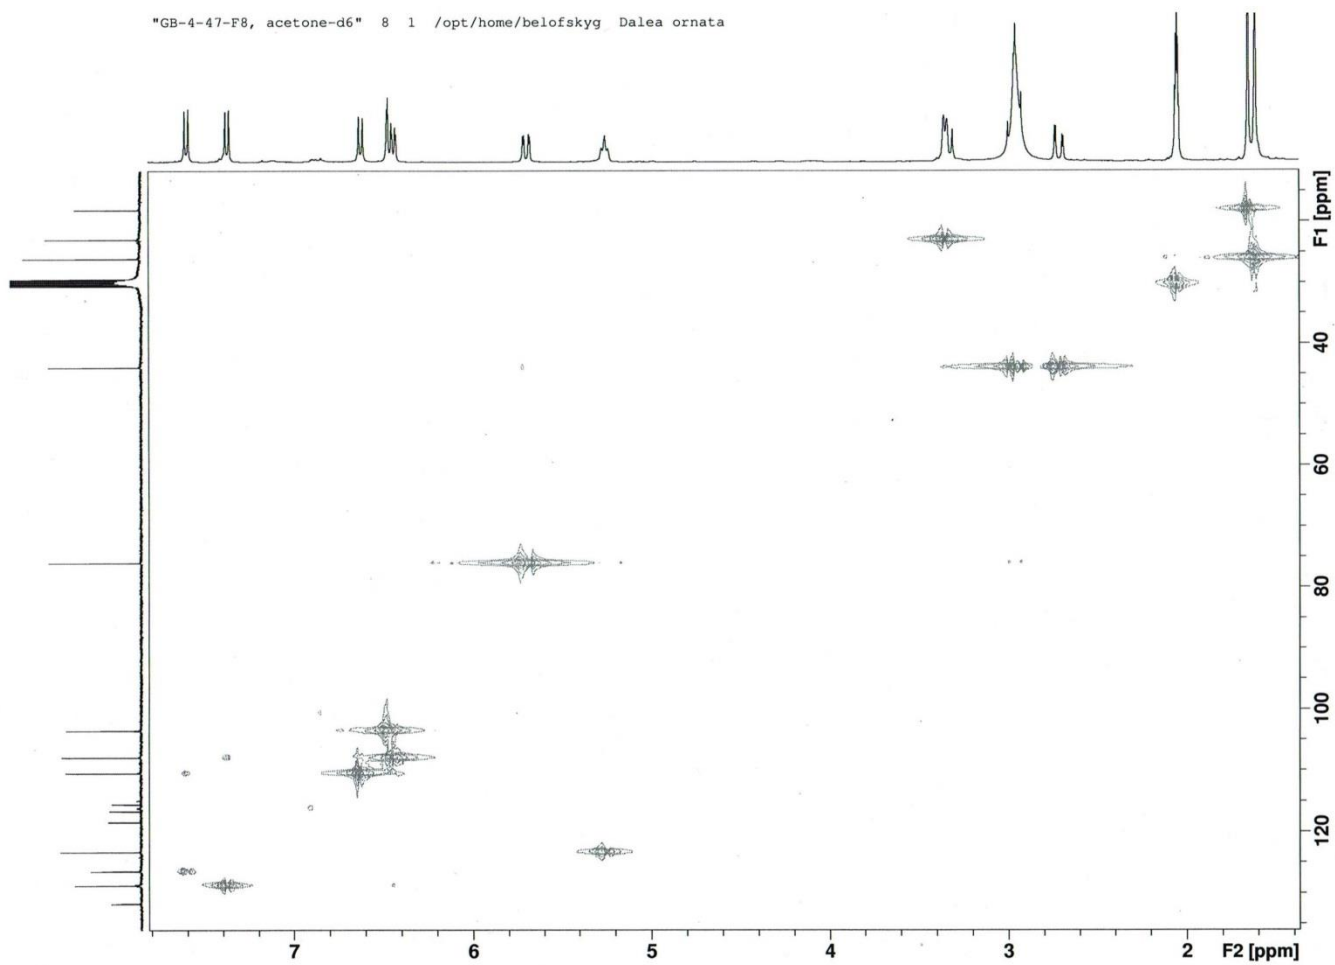

**Figure S21.** HSQC spectrum of (-)-euchrenone a<sub>7</sub> (**5**) (400 MHz; acetone-*d*<sub>6</sub>).

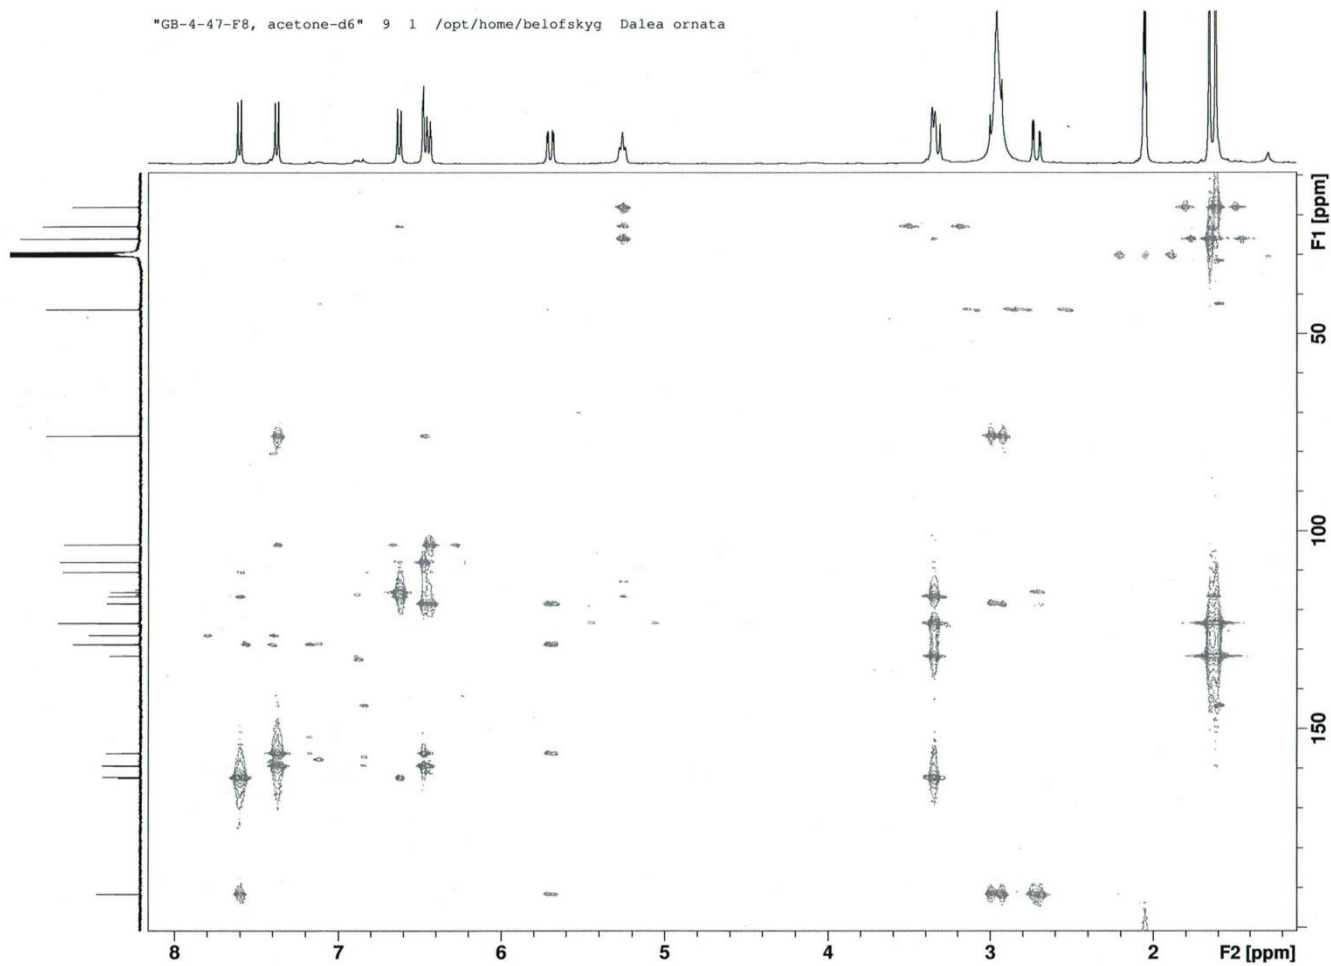

**Figure S22.** HMBC spectrum of (-)-euchrenone  $a_7$  (**5**) (400 MHz; acetone- $d_6$ ).



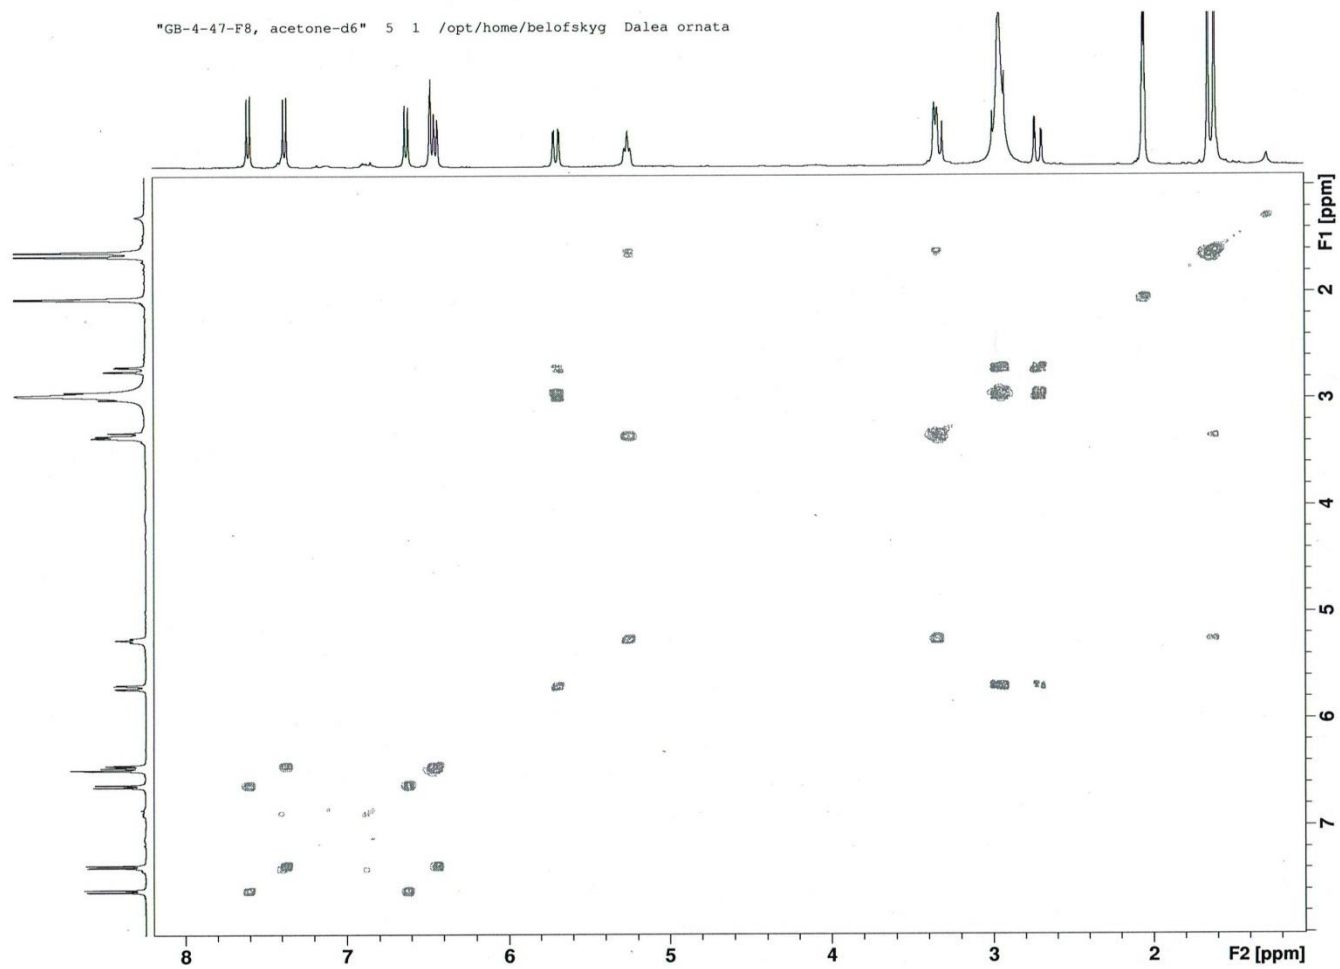

**Figure S23.** COSY spectrum of (-)-euchrenone a<sub>7</sub> (**5**) (400 MHz; acetone-*d*<sub>6</sub>).

"GB-4-41-F7, acetone-d6" 6 1 /opt/home/belofskyg Dalea ornata

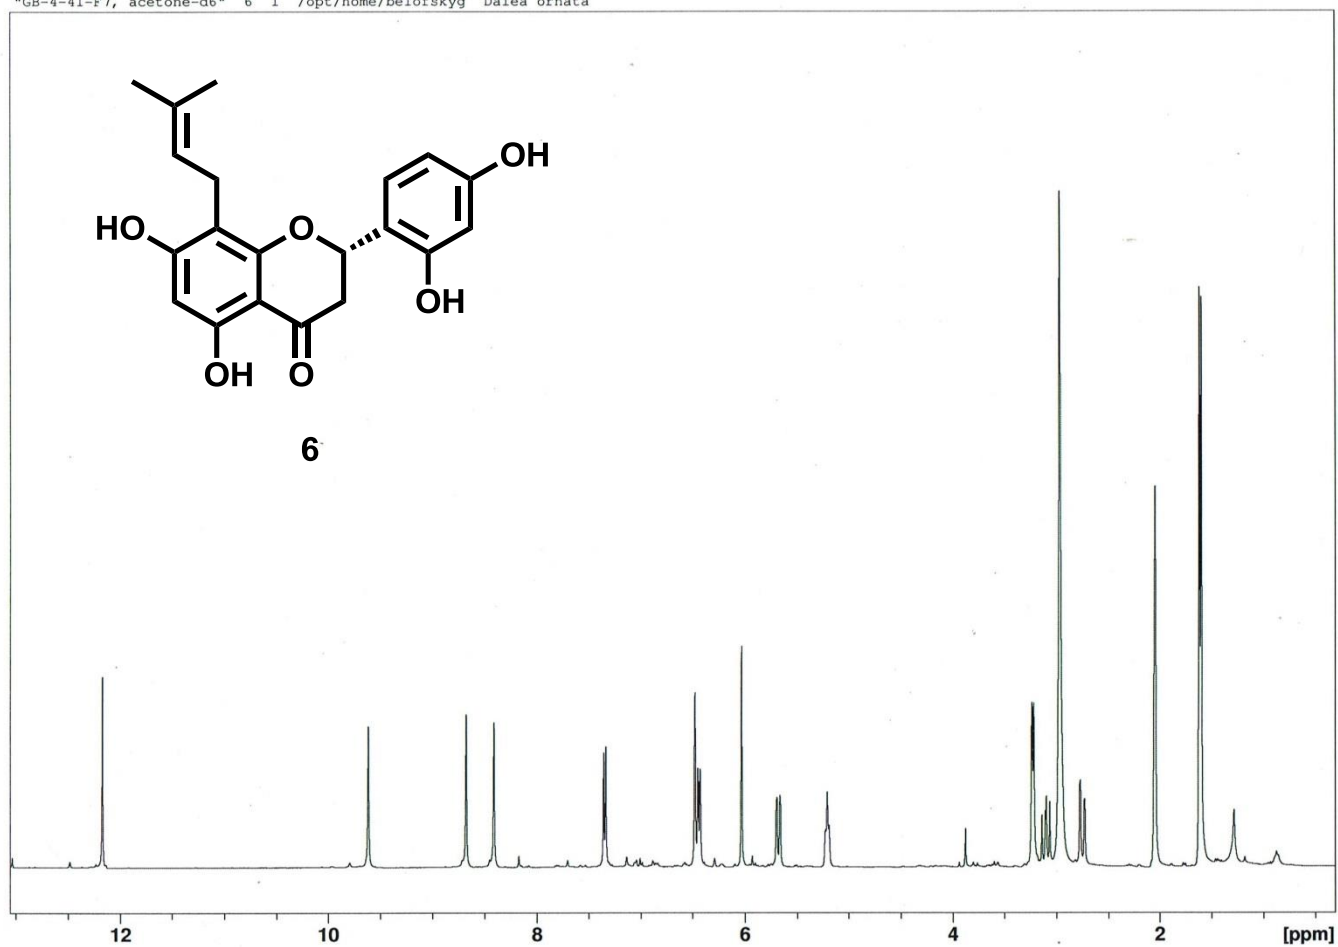

**Figure S24.** <sup>1</sup>H NMR spectrum of (2S)-leachianone G (**6**) (400 MHz; acetone-*d*<sub>6</sub>).

"GB-4-41-F7, acetone-d6" 2 1 /opt/home/belofskyg Dalea ornata

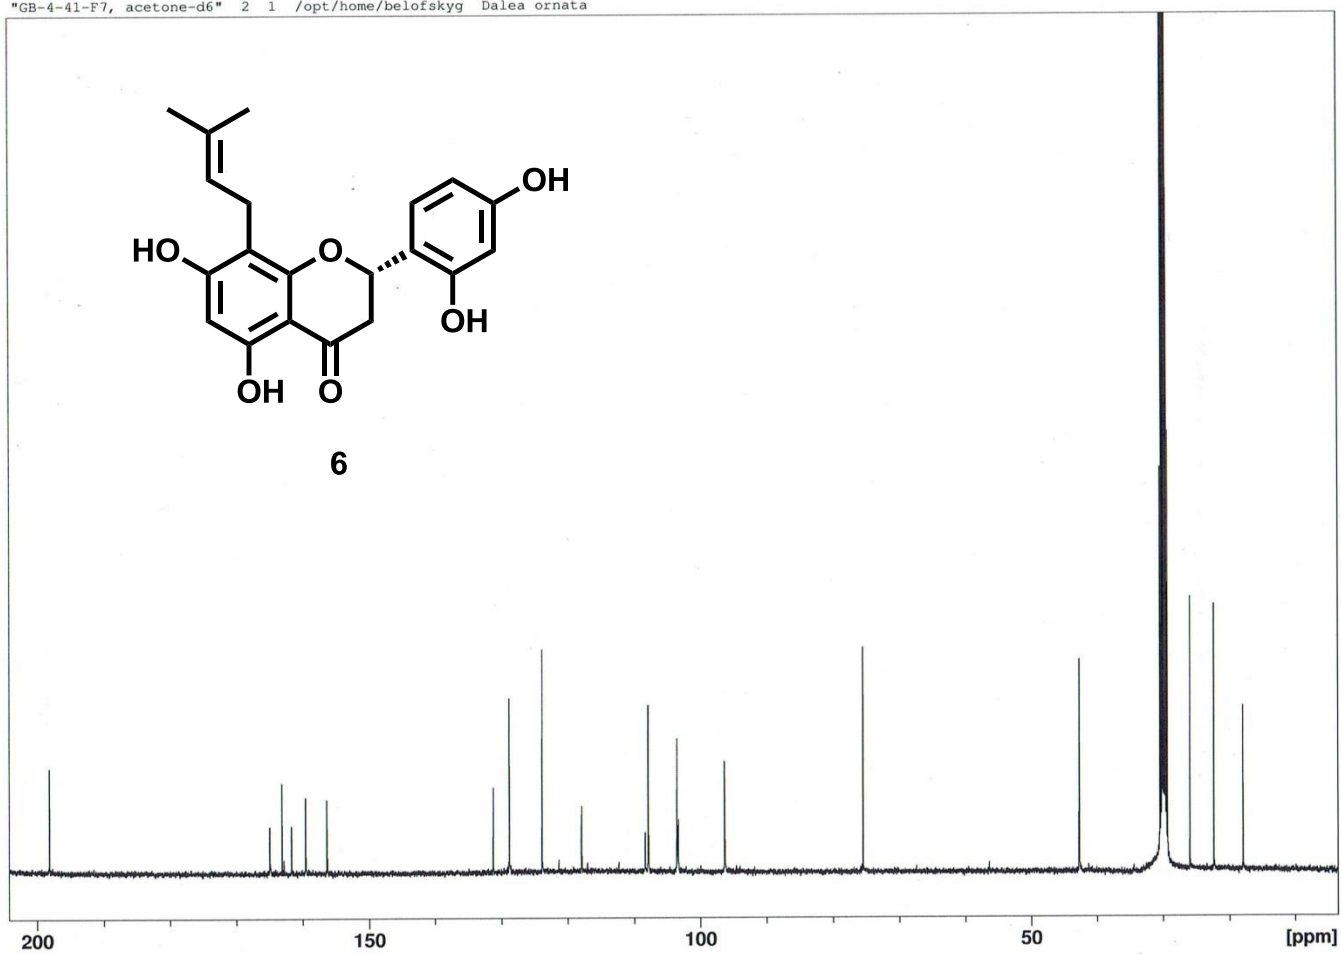

**Figure S25.** <sup>13</sup>C NMR spectrum of (2S)-leachianone G (**6**) (100 MHz; acetone-*d*<sub>6</sub>).

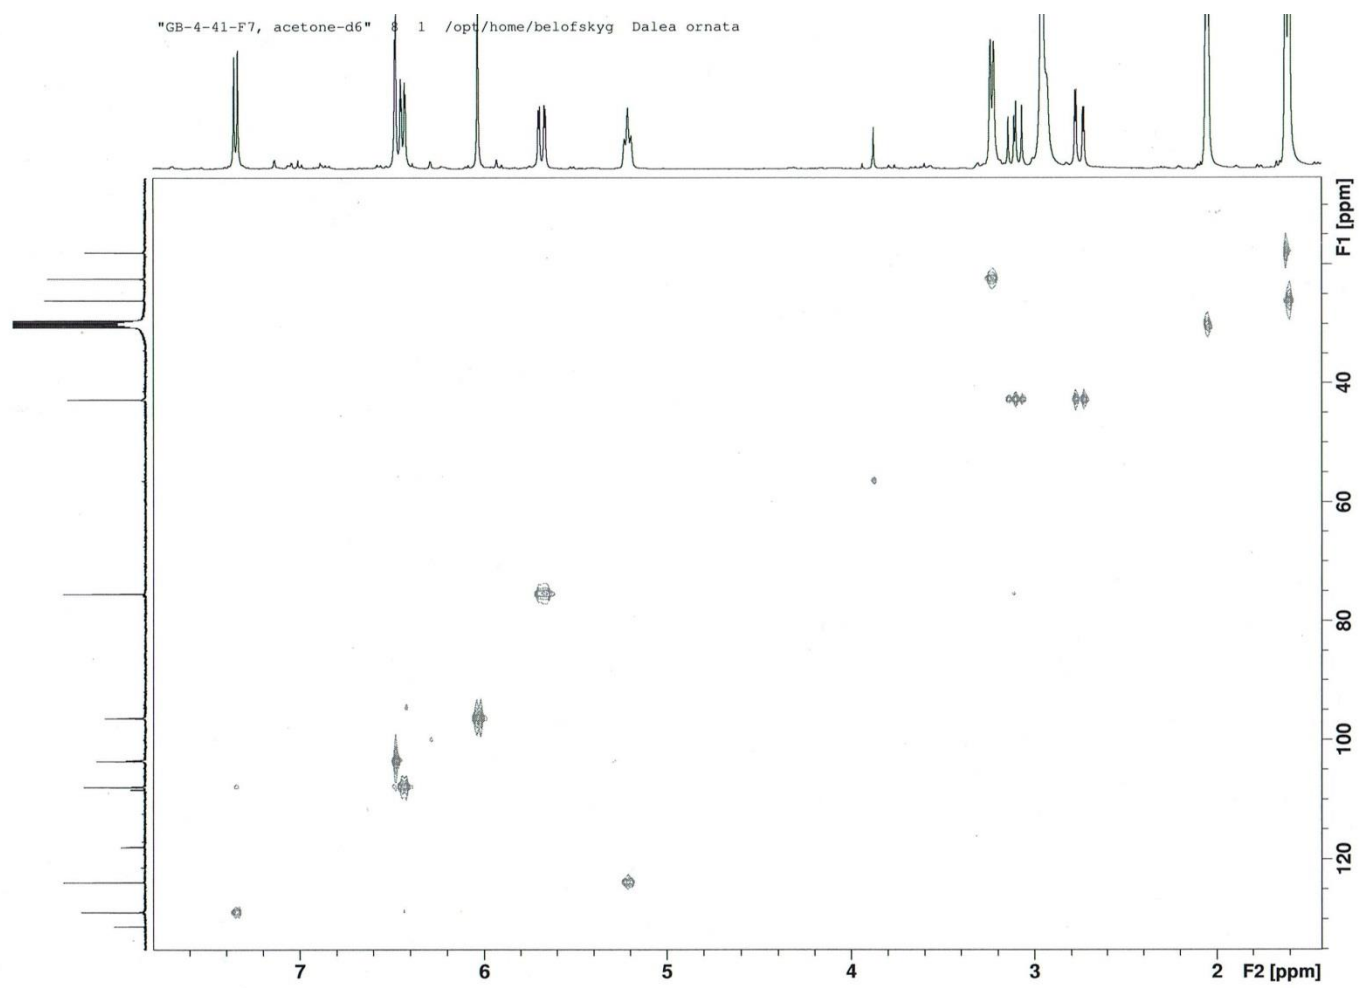

**Figure S26.** HSQC spectrum of (2*S*)-leachianone G (**6**) (400 MHz; acetone-*d*<sub>6</sub>).

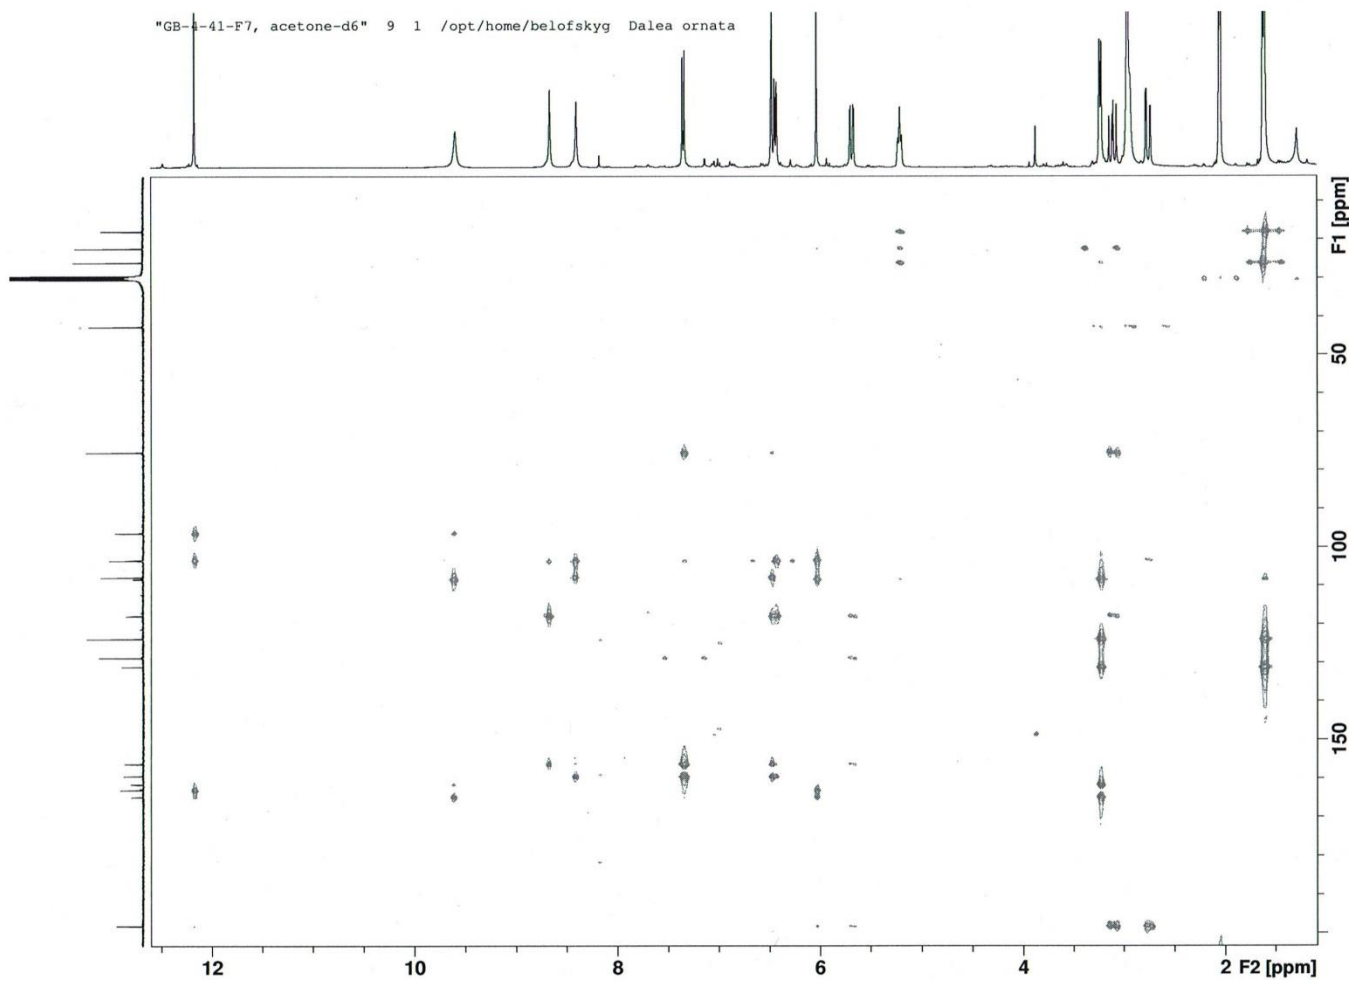

**Figure S27.** HMBC spectrum of (*2S*)-leachianone G (**6**) (400 MHz; acetone-*d*<sub>6</sub>).

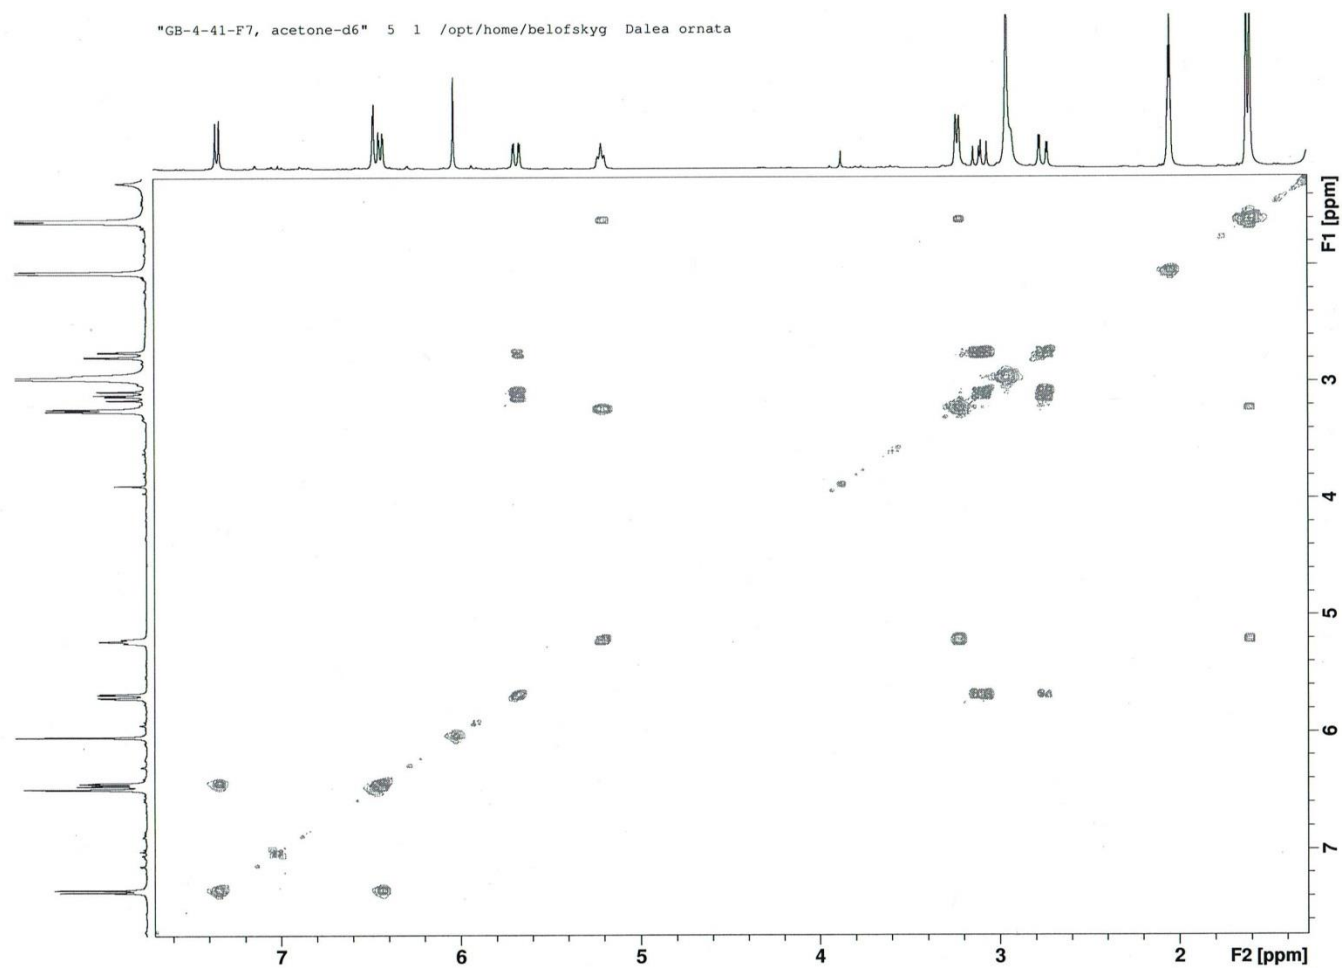

**Figure S28.** COSY spectrum of (2*S*)-leachianone G (**6**) (400 MHz; acetone-*d*<sub>6</sub>).

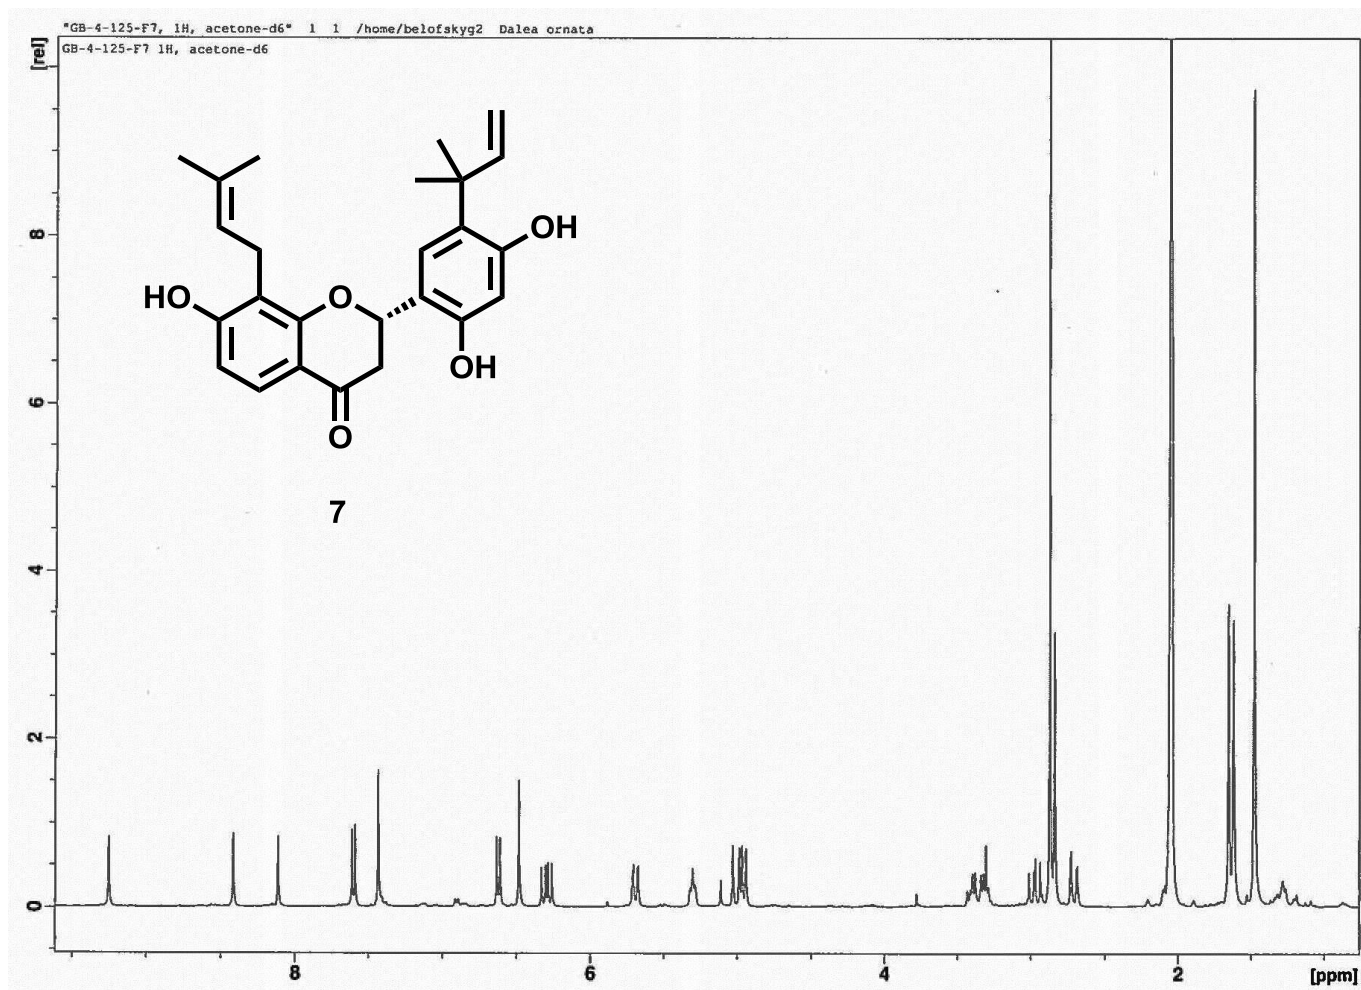

**Figure S29.**  $^1\text{H}$  NMR spectrum of (-)-malheuran B (7) (400 MHz; acetone- $d_6$ ).

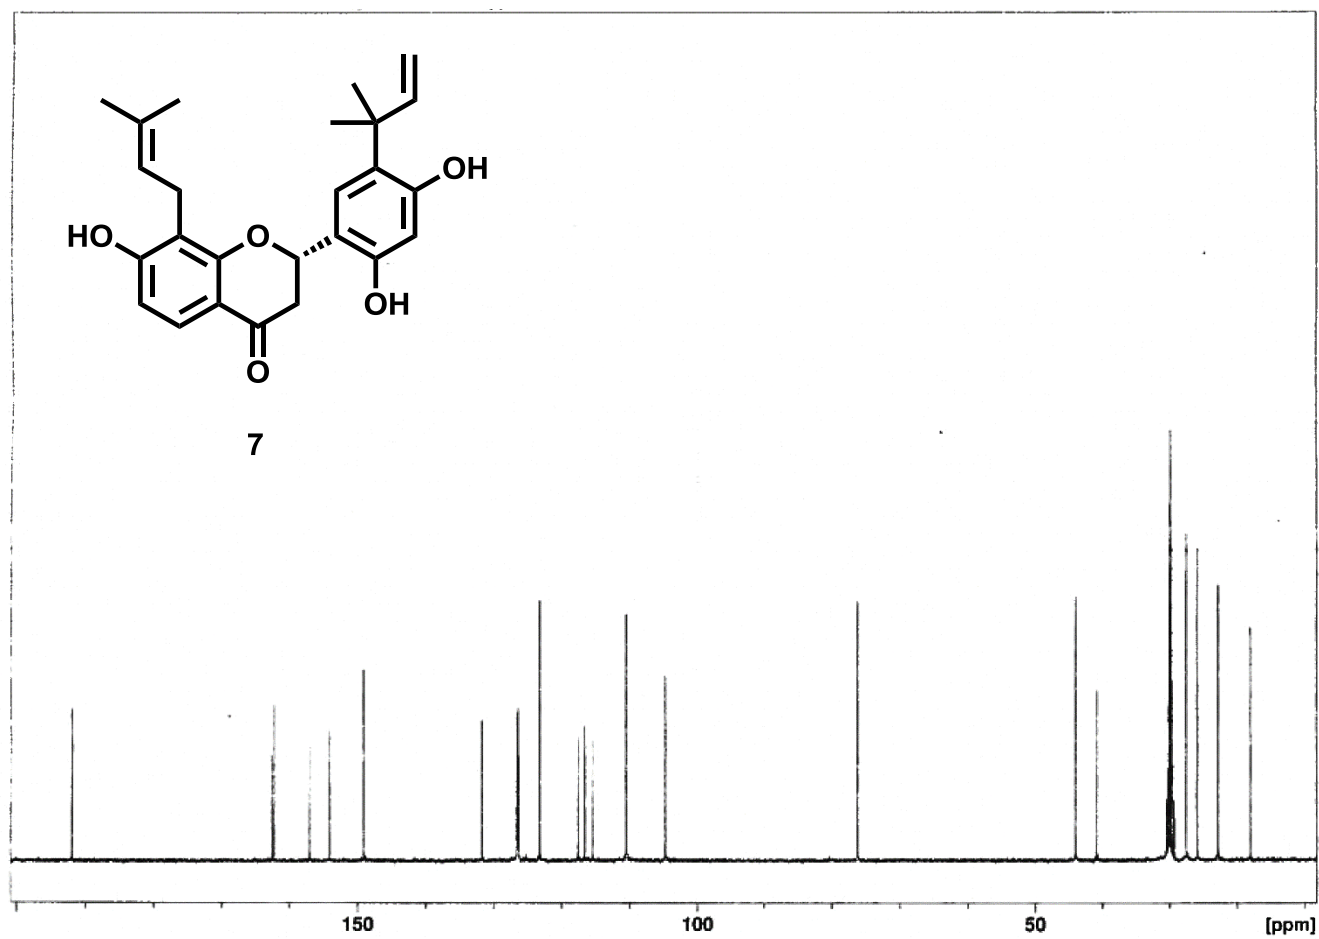

**Figure S30.** <sup>13</sup>C NMR spectrum of (-)-malheuran B (**7**) (100 MHz; acetone-*d*<sub>6</sub>).



"GB-4-33-F6, 1H, acetone-d6" 1 1 /opt/home/belofskyg Dalea ornata

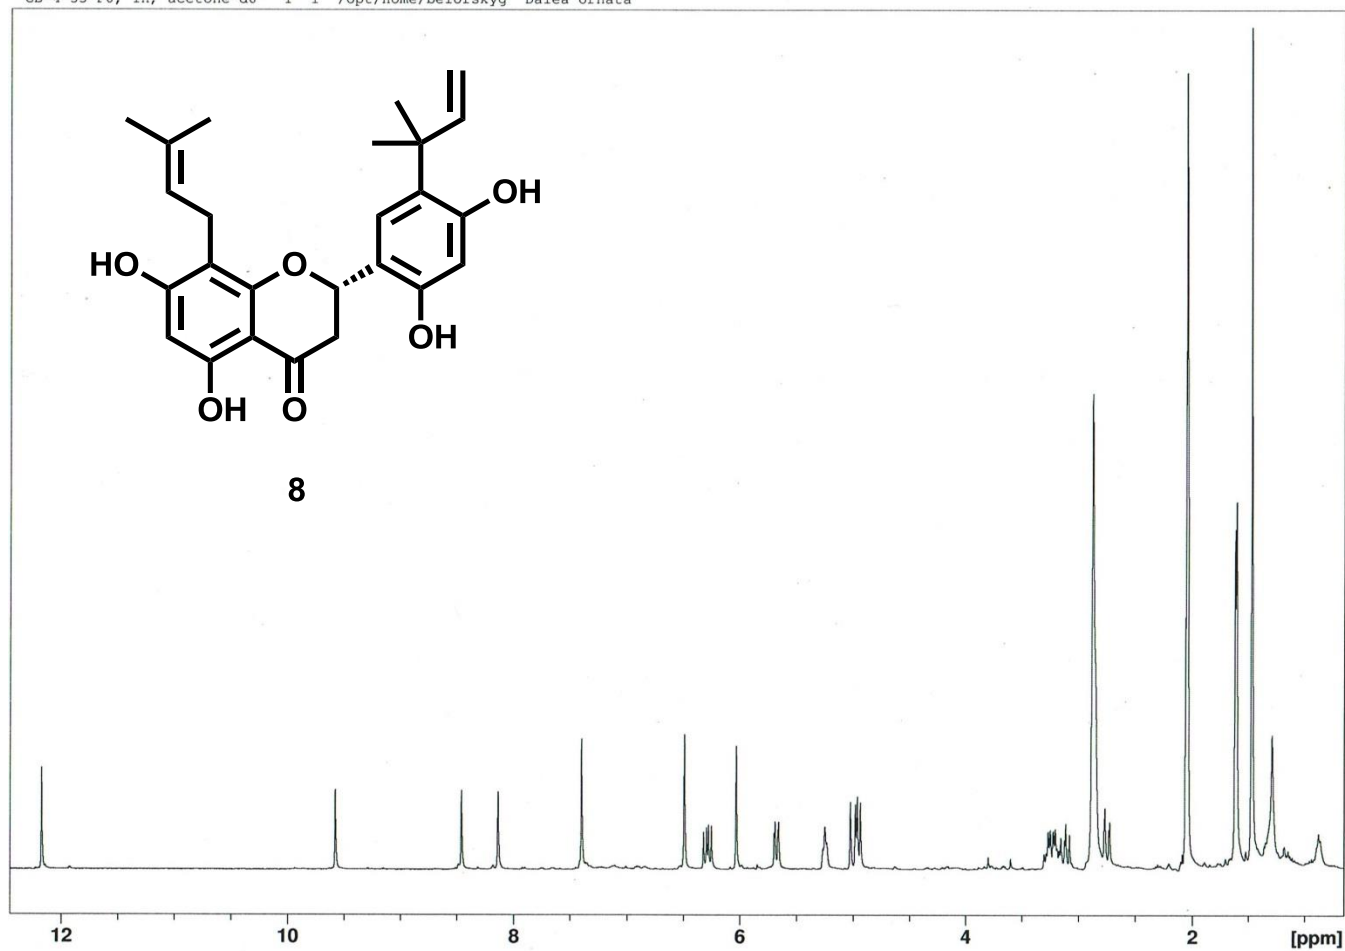

**Figure S31.** <sup>1</sup>H NMR spectrum of (2*S*)-5'-(2-methylbut-3-en-2-yl)-8-(3-methylbut-2-en-1-yl)-5,7,2',4'-tetrahydroxyflavanone (**8**) (400 MHz; acetone-*d*<sub>6</sub>).

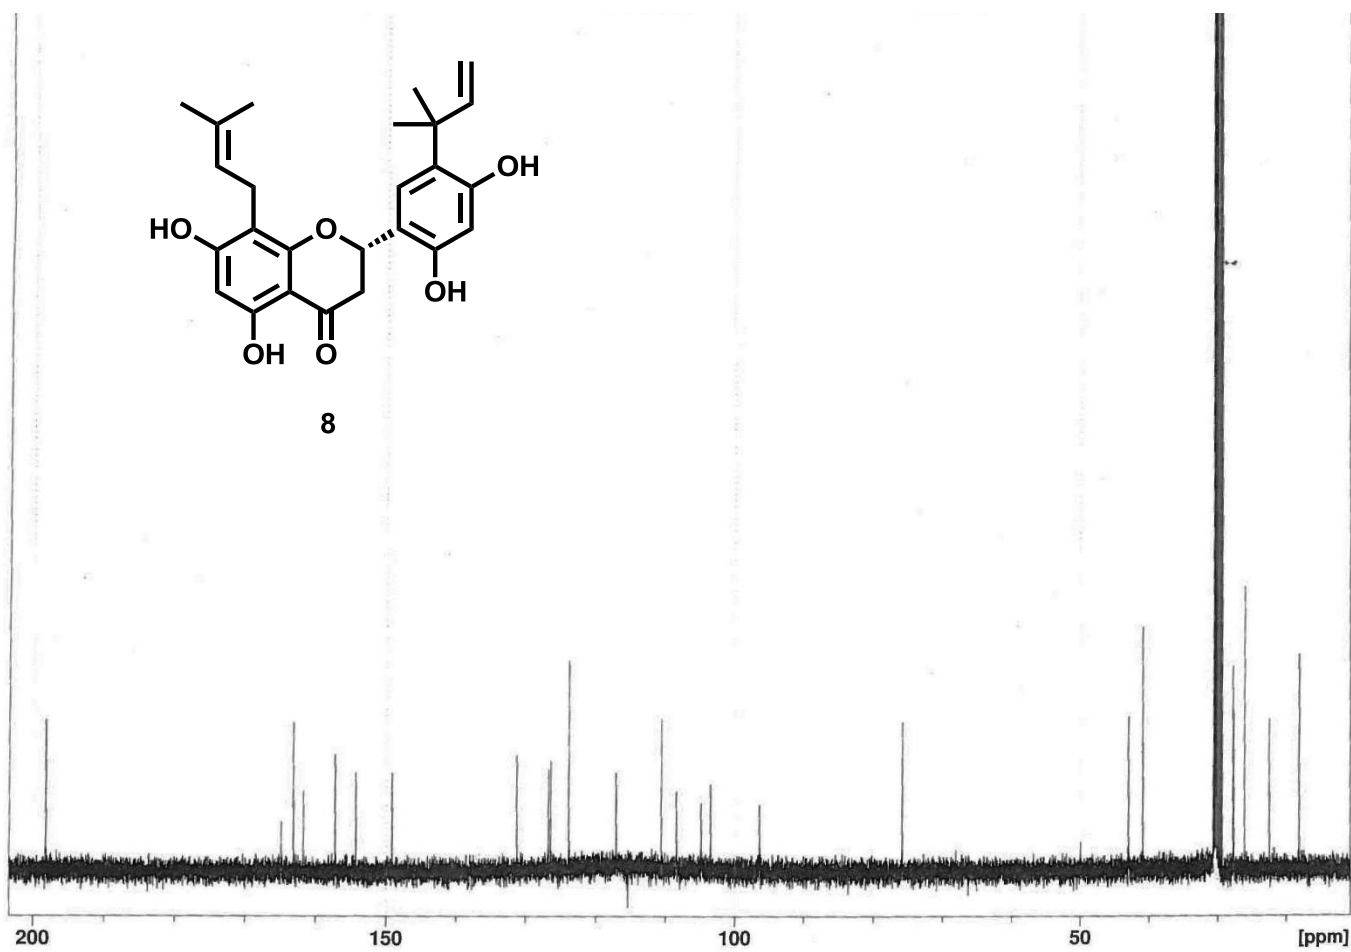

**Figure S32.**  $^{13}\text{C}$  NMR spectrum of (2*S*)-5'-(2-methylbut-3-en-2-yl)-8-(3-methylbut-2-en-1-yl)-5,7,2',4'-tetrahydroxyflavanone (**8**) (100 MHz; acetone- $d_6$ ).

"GB-4-107-F1, acetone-D6" 1 1 /opt/home/belofskyg Dalea ornata

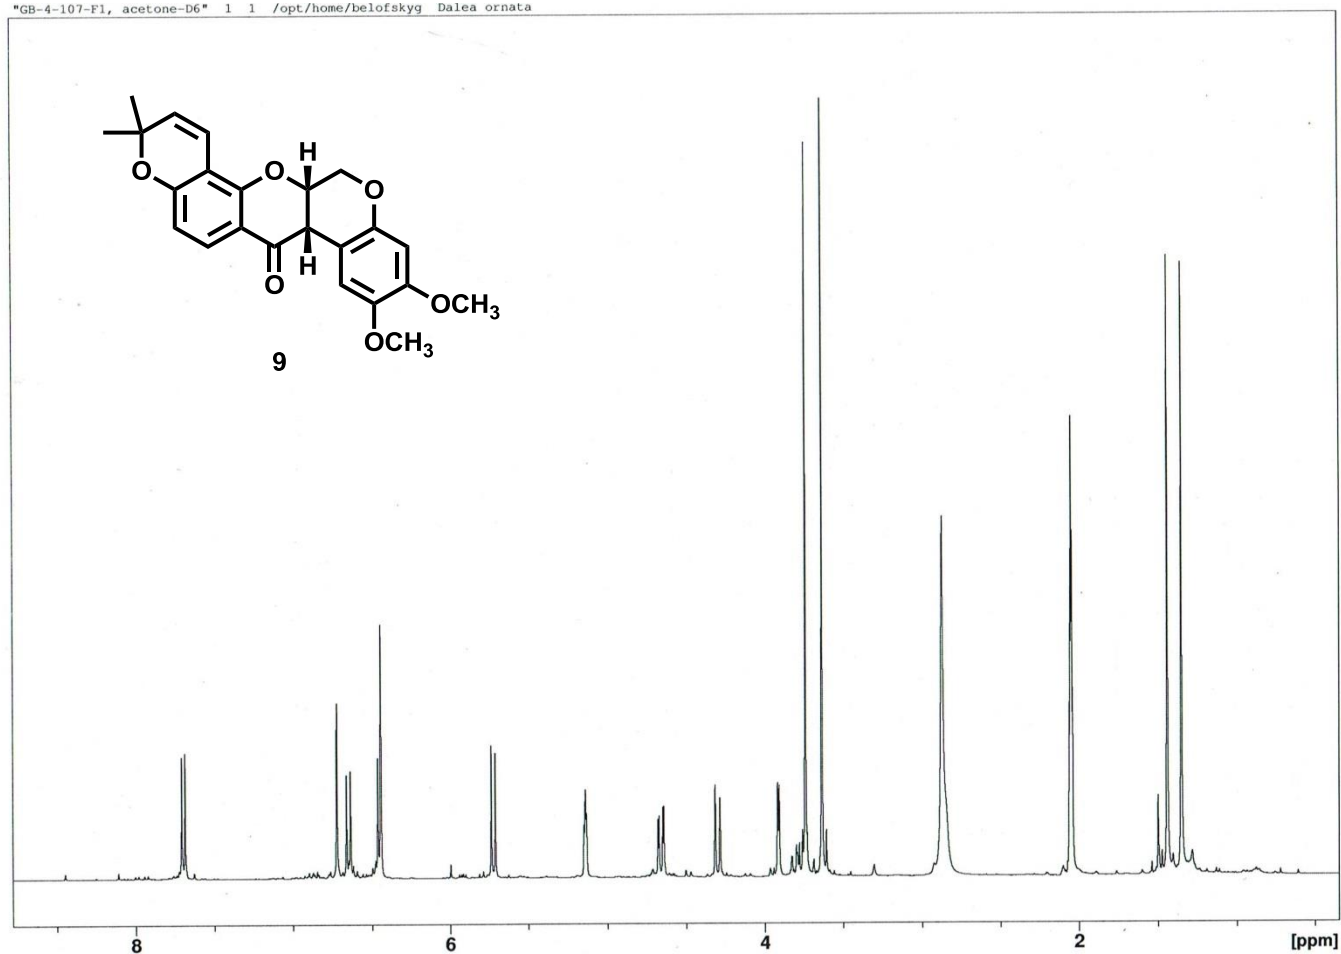

**Figure S33.**  $^1\text{H}$  NMR spectrum of (-)-deguelin (**9**) (400 MHz; acetone- $d_6$ ).

\*GB-4-107-F1, acetone-D6\* 5 1 /opt/home/belofskyg Dalea ornata

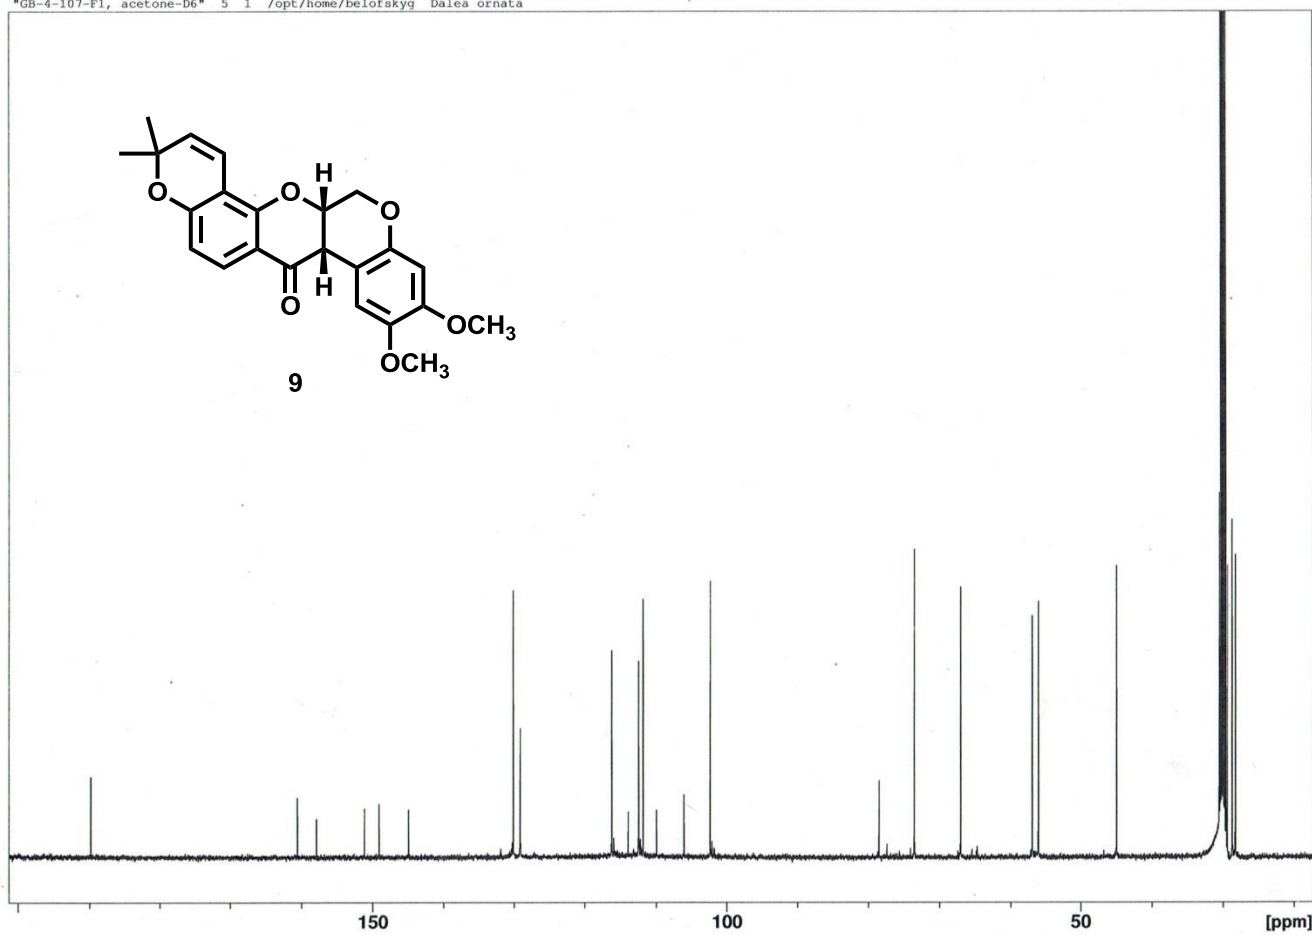

**Figure S34.** <sup>13</sup>C NMR spectrum of (-)-deguelin (**9**) (100 MHz; acetone-*d*<sub>6</sub>).

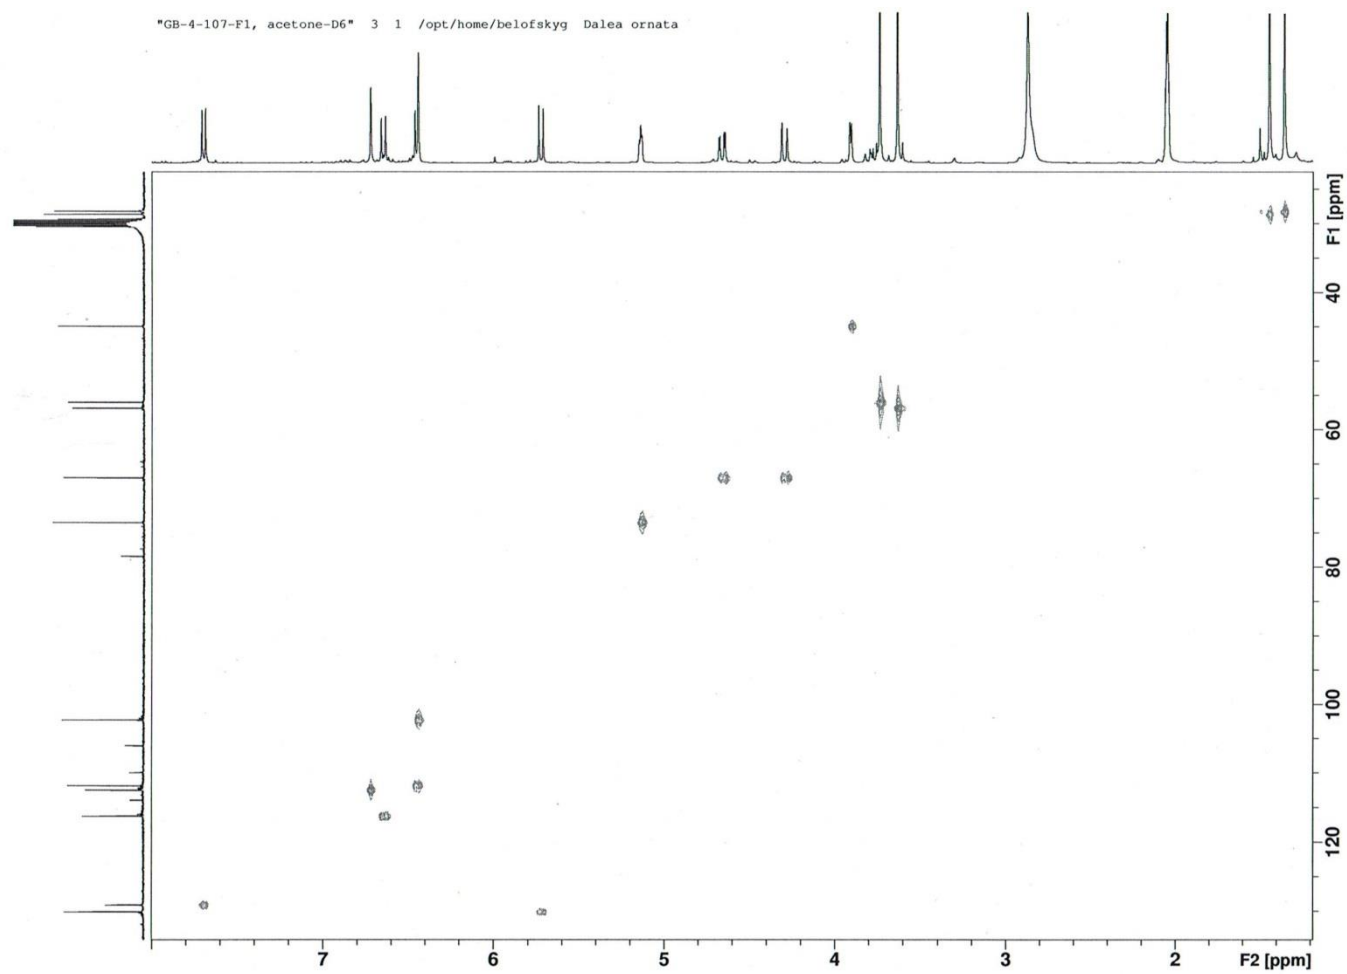

**Figure S35.** HSQC spectrum of (-)-deguelin (**9**) (400 MHz; acetone-*d*<sub>6</sub>).

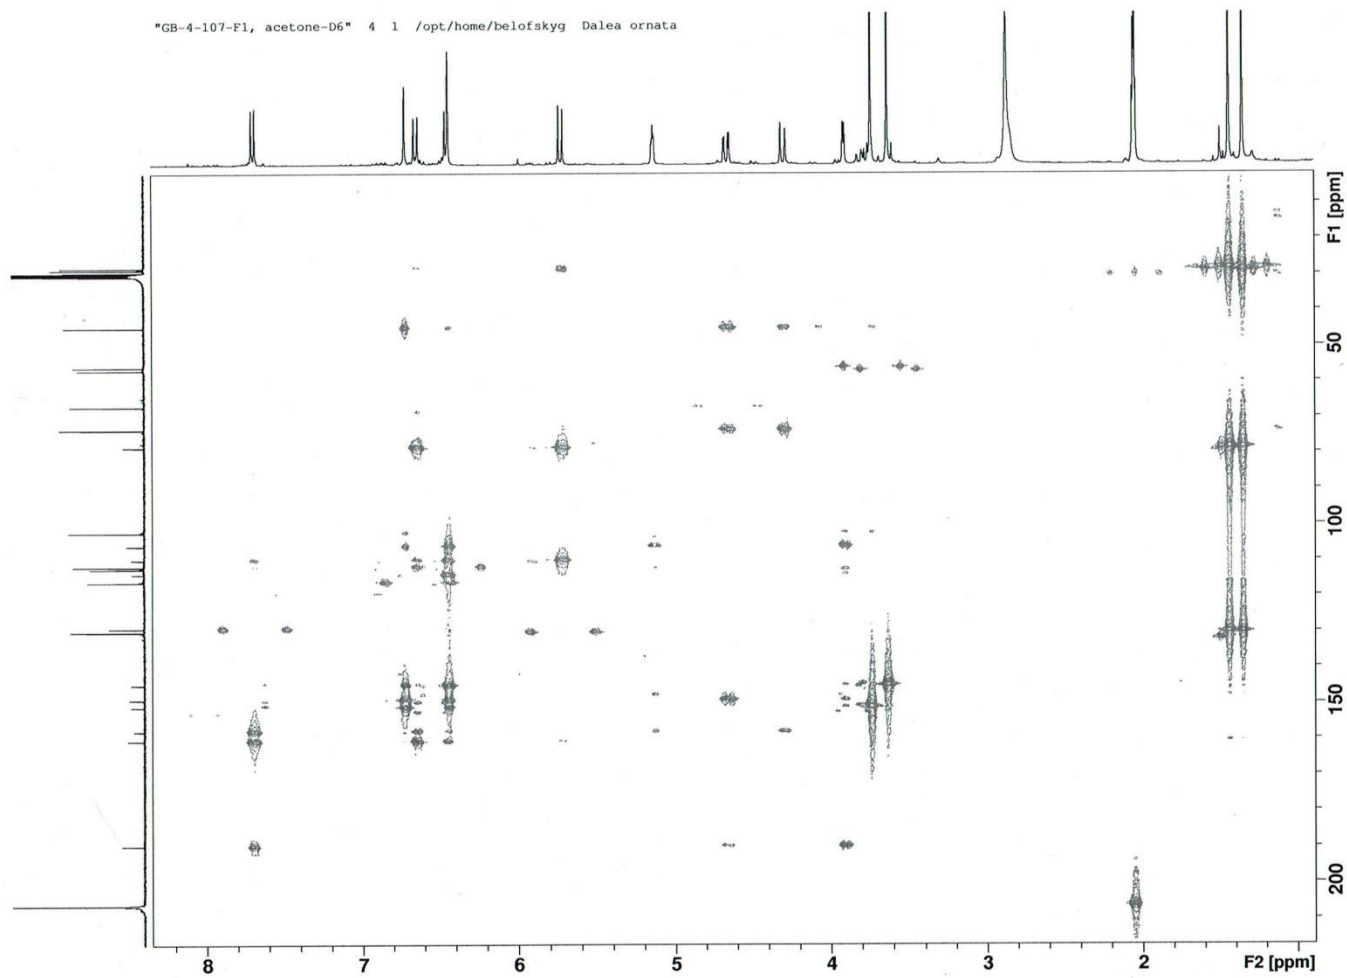

**Figure S36.** HMBC spectrum of (-)-deguelin (**9**) (400 MHz; acetone- $d_6$ ).

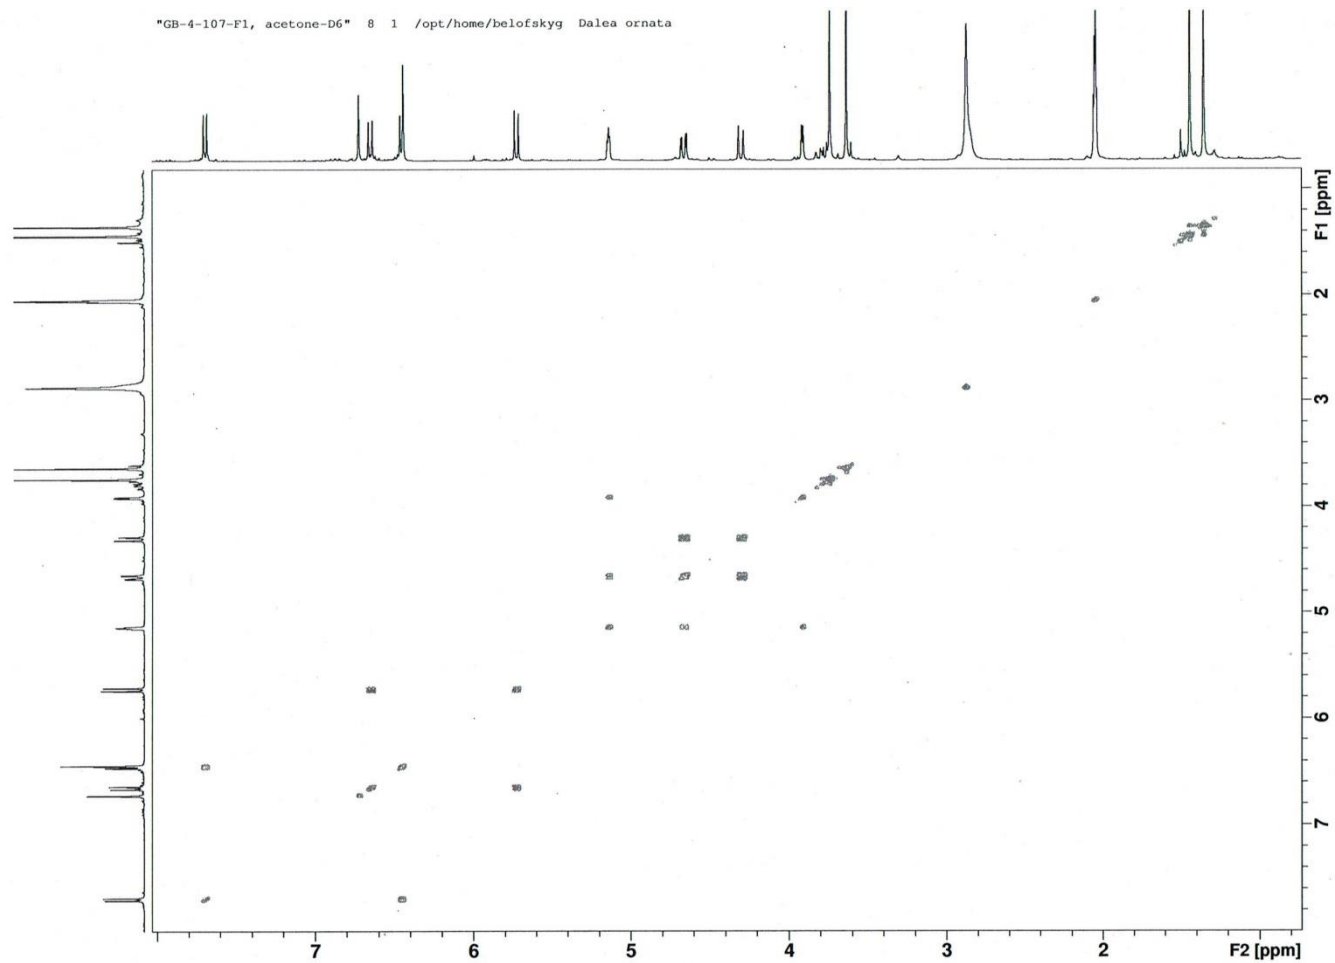

**Figure S37.** COSY spectrum of (-)-deguelin (**9**) (400 MHz; acetone- $d_6$ ).

"GB-4-109-F2, acetone-d6" 1 1 /opt/home/belofskyg Dalea ornata

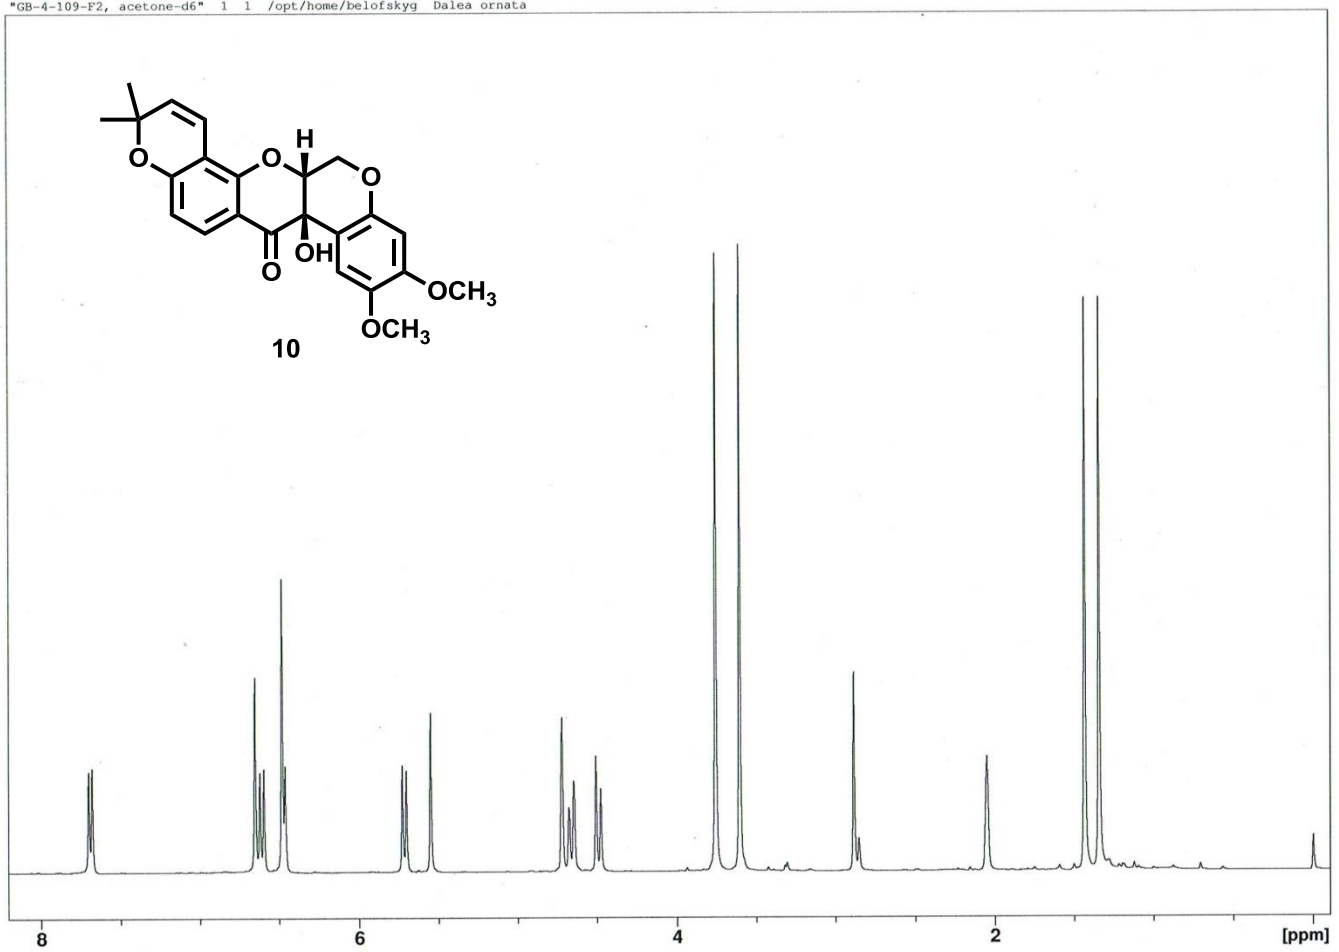

**Figure S38.** <sup>1</sup>H NMR spectrum of (-)-tephrosin (**10**) (400 MHz; acetone-*d*<sub>6</sub>).



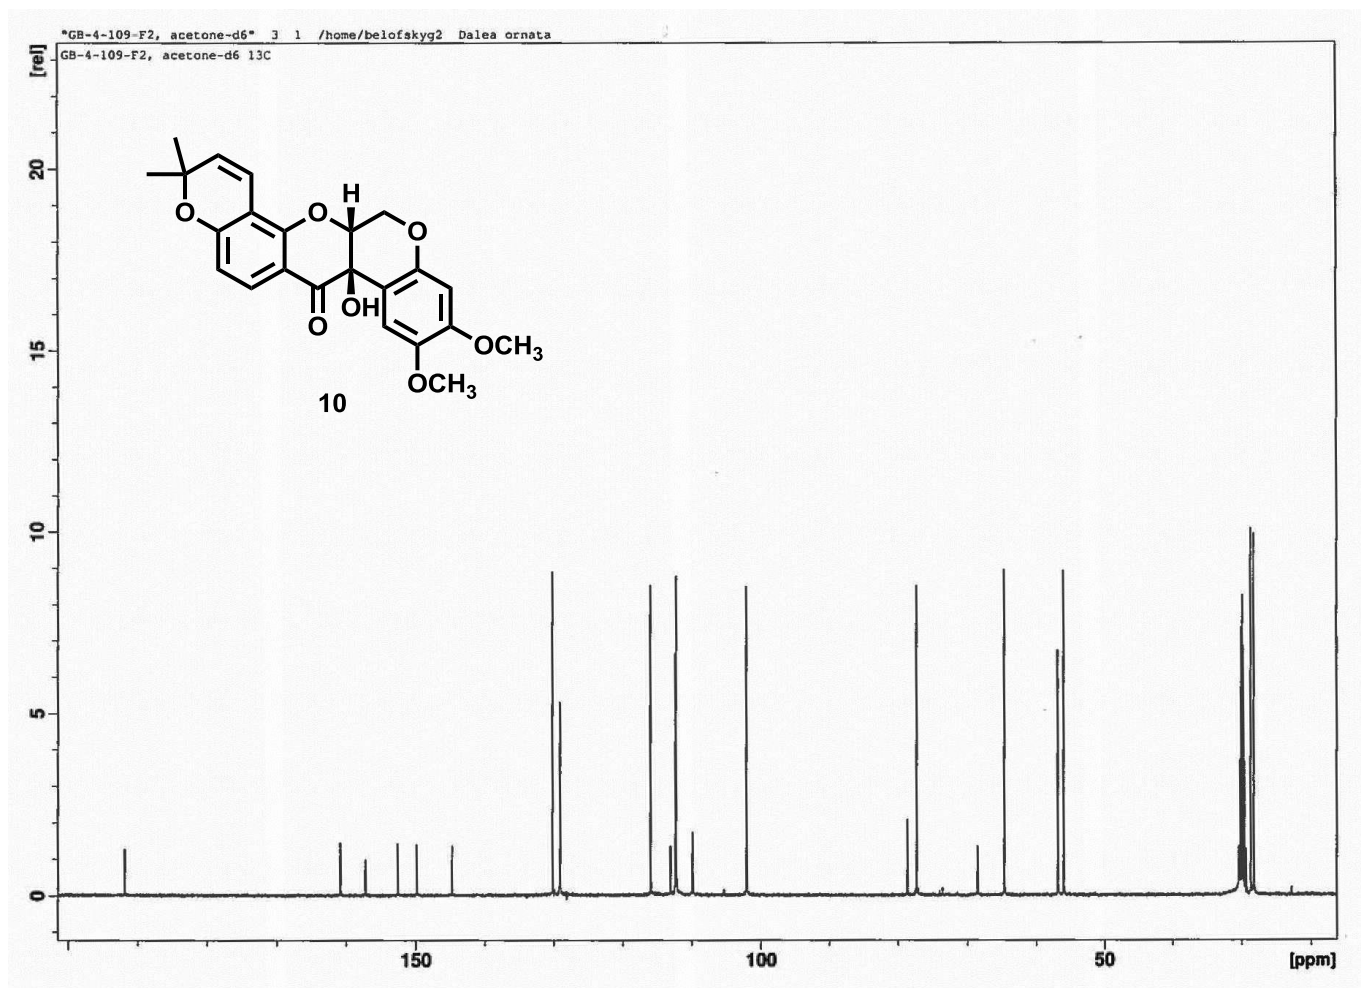

**Figure S39.**  $^{13}\text{C}$  NMR spectrum of (-)-tephrosin (**10**) (100 MHz; acetone- $d_6$ ).
